# Supplementary material
Source: PubMed Central journal article supplement (PMC4783291)
Supplement: NIHMS714048-supplement-01.pdf [file NIHMS714048-supplement-01.pdf]

**Online Supplementary Materials**

**Figure S1. Search terms for systematic review**

**Figure S2. Articles included in systematic review**

## Supplementary Materials

### Figure S1. Search terms for systematic review

#### Database: Pubmed

##### Terms:

(In EN, Change field to insert before text (no space):

[http://www.ncbi.nlm.nih.gov/entrez/query.fcgi?cmd=Retrieve&db=pubmed&dopt=Abstract&list\\_uids=](http://www.ncbi.nlm.nih.gov/entrez/query.fcgi?cmd=Retrieve&db=pubmed&dopt=Abstract&list_uids=)

clinical trial, phase i [pt] or "phase i" [tw] or "phase 1" [tw] or "phase 1/2" [tw] or "phase i/ii" [tw]

AND

(normal [tw] or healthy [tw]) and (participant\* or volunteer\* [tw] or men [tw] or women [tw] or adult\* [tw] or children [tw] or research subjects [mh])

OR

Vaccine\* [tw] and (participant\* [tw] or volunteer\* [tw] or men [tw] or women [tw] or adult\* [tw] or children [tw] or research subjects [mh])

AND

adverse effects [sh] or adverse [tw] or safety or risk [mh] or risk [tw] or risk assessment [mh]

#### Database: Embase

##### Terms:

Phase 1 clinical trial/de or "phase 1/2" or "phase i/ii"

AND

Normal human/de or volunteer/de or men or women or children

OR

Vaccine/exp AND ('volunteer'/exp OR 'normal human'/exp OR men OR women OR children)

AND

Risk/de or risk assessment/de or risk-benefit analysis/de or adverse drug reaction/exp or side effect/exp

#### Database: Cochrane Central Register of Controlled Trials

##### Terms:

"phase i" [tw] or "phase 1" [tw] or "phase i/ii" [tw] or "phase 1/2"[tw]

and

(normal [tw] or healthy[tw]) and (volunteer\* [tw] or "research subjects")

and

adverse [tw] or risk [tw] or toxic\* [tw] or "side effects" [tw]

#### Database: Scopus

##### Terms:

phase i" OR "phase 1" OR "phase i/ii" OR "phase 1/2"

AND

((vaccine\* OR normal OR healthy) AND (volunteer\* OR "research subjects" OR participant\* OR men OR women OR children))

AND

(adverse OR risk OR toxic\* OR "side effects" OR safety))

#### Database: PsycInfo

##### Terms:

phase i" OR "phase 1" OR "phase i/ii" OR "phase 1/2"

AND

vaccine\* OR normal OR healthy

AND

volunteer\* OR subject\* OR participant\*  
AND  
adverse OR risk OR toxic\* OR "side effects" OR safety

**Figure S2. Articles included in systematic review**

1. Abbas R, Hug BA, Leister C, Gaaloul ME, Chalon S, Sonnichsen D. A phase I ascending single-dose study of the safety, tolerability, and pharmacokinetics of bosutinib (SKI-606) in healthy adult subjects. *Cancer Chemother Pharmacol.* 2011; 69(1):221–7.
2. Abbas R, Leister C, Gaaloul ME, Chalon S, Sonnichsen D. Ascending single-dose study of the safety profile, tolerability, and pharmacokinetics of bosutinib coadministered with ketoconazole to healthy adult subjects. *Clin Ther.* 2012;34(9):2011–19.
3. Abd-Elaziz K, Kamphuisen PW, Lyssens C, Reuvers M, den Daas I, Van Bockstaele F, et al. safety, tolerability, pharmacokinetics and pharmacodynamics of anti-vwf nanobody ALX-0681 after single and multiple subcutaneous administrations to healthy volunteers. *Blood.* 2009; 114; abstract 1063.
4. Abel S, Russell D, Taylor-Worth RJ, Ridgway CE, Muirhead GJ. Effects of CYP3A4 inhibitors on the pharmacokinetics of maraviroc in healthy volunteers. *Br J Clin Pharmacol.* 2008;65(s1):27–37.
5. Acharya M, Bernard A, Gonzalez M, Jiao J, Vries R, Tran N. Open-label, phase I, pharmacokinetic studies of abiraterone acetate in healthy men. *Cancer Chemother Pharmacol.* 2012;69(6):1583–90.
6. Aguilar-Betancourt A, González-Delgado CA, Cinza-Estévez Z, Martínez-Cabrera J, Véliz-Ríos G, Alemán-Zaldívar R, et al. Safety and immunogenicity of a combined hepatitis B virus-Haemophilus influenzae type B vaccine comprising a synthetic antigen in healthy adults. *Hum Vaccin.* 2008 Feb;4(1):54–9.
7. Ahmed T, Sharma P, Gautam A, Varshney B, Kothari M, Ganguly S, et al. Safety, Tolerability, and Single- and Multiple-Dose Pharmacokinetics of Piperazine Phosphate in Healthy Subjects. *J Clin Pharmacol.* 2008;48(2):166–75.
8. Aichinger G, Ehrlich HJ, Aaskov JG, Fritsch S, Thomasser C, Draxler W, et al. Safety and immunogenicity of an inactivated whole virus Vero cell-derived Ross River virus vaccine: A randomized trial. *Vaccine.* 2011;29(50):9376–84.
9. Akers WS, Oh JJ, Oestreich JH, Ferraris S, Wethington M, Steinhubl SR. Pharmacokinetics and pharmacodynamics of a bolus and infusion of cangrelor: a direct, parenteral p2y12 receptor antagonist. *J Clin Pharmacol.* 2010;50(1):27–35.
10. Anderson MS, Kakuda TN, Hanley W, Miller J, Kost JT, Stoltz R, et al. Minimal pharmacokinetic interaction between the human immunodeficiency virus nonnucleoside reverse transcriptase inhibitor etravirine and the integrase inhibitor raltegravir in healthy subjects. *Antimicrob Agents Chemother.* 2008 6;52(12):4228–32.
11. Angiolillo DJ, Hwang C, Datto C, Desai B, Sostek M. Impact of a fixed-dose combination of naproxen and esomeprazole magnesium on serum thromboxane b2 inhibition by low-dose aspirin over 5 days in healthy adults: a phase i, randomized, double-blind, placebo-controlled, noninferiority trial. *Clin Ther.* 2011;33(12):1883–93.
12. Anh DD, Van Trang N, Thiem VD, Anh NTH, Mao ND, Wang Y, et al. A dose-escalation safety and immunogenicity study of a new live attenuated human rotavirus vaccine (Rotavin-M1) in Vietnamese children. *Vaccine.* 2012 Apr;30:A114–A121.
13. Antonik LJ, Goldwater DR, Kilpatrick GJ, Tilbrook GS, Borkett KM. A placebo- and midazolam-controlled phase i single ascending-dose study evaluating the safety, pharmacokinetics, and pharmacodynamics of remimazolam (CNS 7056). *Anesth Analg.* 2012;115(2):274–83.

14. Appel L, Geffen Y, Heurling K, Eriksson C, Antoni G, Kapur S. BL-1020, a novel antipsychotic candidate with GABA-enhancing effects: D2 receptor occupancy study in humans. *Eur Neuropsychopharmacol*. Dec;19(12):841–50.
15. Asano Y, Inoue Y, Ikeda Y, Kikuchi K, Hara T, Taguchi C, et al. Phase I clinical study of NMK36: a new PET tracer with the synthetic amino acid analogue anti-[18F]FACBC. *Ann Nucl Med*. 2011;25(6):414–8.
16. Ashby J, Garvey L, Erlwein OW, Lamba H, Weston R, Legg K, et al. Pharmacokinetic and safety profile of raltegravir and ribavirin, when dosed separately and together, in healthy volunteers. *J Antimicrob Chemother*. 2011;66(6):1340–5.
17. Atsmon J, Kate-Ilovitz E, Shaikovich D, Singer Y, Volokhov I, Haim KY, et al. Safety and immunogenicity of multimeric-001—a novel universal influenza vaccine. *J Clin Immunol*. 2012; 9;32(3):595–603.
18. Audran R, Lurati-Ruiz F, Genton B, Blythman HE, Ofori-Anyinam O, Reymond C, et al. The synthetic plasmodium falciparum circumsporozoite peptide PfCS102 as a malaria vaccine candidate: a randomized controlled phase I trial. Diemert DJ, editor. *PLoS One*. 2009;4(10):e7304.
19. Azuma J, Kato M, Okazaki A. Safety, tolerability, and pharmacokinetics of bolus injection followed by continuous infusion of nicorandil in healthy subjects. *Jpn Pharmacol Ther*. 2008;36:S15–S24.
20. Baden LR, Blattner WA, Morgan C, Huang Y, Defawe OD, Sobieszczyk ME, et al. Timing of plasmid cytokine (IL-2/Ig) administration affects HIV-1 vaccine immunogenicity in HIV-seronegative subjects. *J Infect Dis*. 2011;204(10):1541–9.
21. Bakari M, Aboud S, Nilsson C, Francis J, Buma D, Moshiro C, et al. Broad and potent immune responses to a low dose intradermal HIV-1 DNA boosted with HIV-1 recombinant MVA among healthy adults in Tanzania. *Vaccine*. 2011;29(46):8417–28.
22. Barnes E, Folgori A, Capone S, Swadling L, Aston S, Kurioka A, et al. Novel adenovirus-based vaccines induce broad and sustained T cell responses to HCV in man. *Sci Transl Med*. 2012;4(115):115ra1–115ra1.
23. Barrington P, Chien JY, Tibaldi F, Showalter HDH, Schneck K, Ellis B. LY2189265, a long-acting glucagon-like peptide-1 analogue, showed a dose-dependent effect on insulin secretion in healthy subjects. *Diabetes Obes Metab*. 2011;13(5):434–8.
24. Bauman JW, Antal JM, Adams LM, Johnson BM, Murray SC, Peng B, et al. Effect of hepatic or renal impairment on the pharmacokinetics of casopitant, a NK-1 receptor antagonist. *Invest New Drugs*. 2010;30(2):662–71.
25. Beckett CG, Tjaden J, Burgess T, Danko JR, Tamminga C, Simmons M, et al. Evaluation of a prototype dengue-1 DNA vaccine in a Phase 1 clinical trial. *Vaccine*. 2011;29(5):960–8.
26. Beglinger C, Poller B, Arbit E, Ganzoni C, Gass S, Gomez-Orellana I, et al. Pharmacokinetics and Pharmacodynamic Effects of oral GLP-1 and PYY3-36: a proof-of-concept study in healthy subjects. *Clin Pharmacol Ther*. 2008 26;84(4):468–74.
27. Beglinger C, Hu K, Wang Y, Bouillaud E, Darstein C, Wang Y, et al. Multiple once-daily subcutaneous doses of pasireotide were well tolerated in healthy male volunteers: a randomized, double-blind, placebo-controlled, cross-over, Phase I study. *Endocrine*. 2012;42(2):366–74.
28. Beigi R, Noguchi L, Parsons T, Macio I, Kunjara Na Ayudhya RP, Chen J, et al. Pharmacokinetics and placental transfer of single-dose tenofovir 1% vaginal gel in term pregnancy. *J Infect Dis*. 2011;204(10):1527–31.
29. B elard S, Issifou S, Hounkpatin AB, Schaumburg F, Ngoa UA, Esen M, et al. A randomized

- controlled phase Ib trial of the malaria vaccine candidate GMZ2 in African children. *PLoS One*. 2011;6(7): e22525.
30. Bellanti JA, Lin F-YC, Chu C, Shiloach J, Leppla SH, Benavides GA, et al. Phase I study of a recombinant mutant protective antigen of bacillus anthracis. *Clin Vaccine Immunol*. 2011;19(2):140–5.
  31. Bellino S, Francavilla V, Longo O, Tripiciano A, Paniccia G, Arancio A, et al. Parallel conduction of the phase I preventive and therapeutic trials based on the tat vaccine candidate. *Rev Recent Clin Trials*. 2009;4:195–204.
  32. Bernstein DI, Falloon J, Yi T. A randomized, double-blind, placebo-controlled, phase 1/2a study of the safety and immunogenicity of a live, attenuated human parainfluenza virus type 3 vaccine in healthy infants. *Vaccine*. 2011;29(40):7042–8.
  33. Bernstein DI, Sahly HME, Keitel WA, Wolff M, Simone G, Segawa C, et al. Safety and immunogenicity of a candidate parvovirus B19 vaccine. *Vaccine*. 2011;29(43):7357–63.
  34. Bernstein DI, Malkin E, Abughali N, Falloon J, Yi T, Dubovsky F, et al. Phase 1 study of the safety and immunogenicity of a live, attenuated respiratory syncytial virus and parainfluenza virus type 3 vaccine in seronegative children. *Pediatr Infect Dis. J*. 2012;31(2):109–14.
  35. Berthoud TK, Hamill M, Lillie PJ, Hwenda L, Collins KA, Ewer KJ, et al. Potent CD8+ T-Cell immunogenicity in humans of a novel heterosubtypic influenza A vaccine, MVA-NP+M1. *Clin Infect Dis*. 2011;52(1):1–7.
  36. Bettica P, Nucci G, Pyke C, Squassante L, Zamuner S, Ratti E, et al. Phase I studies on the safety, tolerability, pharmacokinetics and pharmacodynamics of SB-649868, a novel dual orexin receptor antagonist. *J Psychopharmacol*. 2011;26(8):1058–70.
  37. Bittner B, Micintyre C, Tian H, Tang K, Shah N, Phuapradit W, et al. Phase I clinical study to select a novel oral formulation for ibandronate containing the excipient sodium N-{8-(2-hydroxybenzoyl) amino} caprylate (SNAC). *Pharmazie*. 2012;67:233–41.
  38. Bitzan M, Poole R, Mehran M, Sicard E, Brockus C, Thuning-Roberson C, et al. Safety and pharmacokinetics of chimeric anti-shiga toxin 1 and anti-shiga toxin 2 monoclonal antibodies in healthy volunteers. *Antimicrob Agents Chemother*. 2009;53(7):3081–7.
  39. Blonk M, Colbers A, Poirters A, Schouwenberg B, Burger D. Effect of ginkgo biloba on the pharmacokinetics of raltegravir in healthy volunteers. *Antimicrob Agents Chemother*. 2012;56(10):5070–5.
  40. Boeckxstaens GE, Rydholm H, Lei A, Adler J, Ruth M. Effect of lesogaberan, a novel GABAB-receptor agonist, on transient lower oesophageal sphincter relaxations in male subjects. *Aliment Pharmacol Ther*. 2010;31(11):1208–17.
  41. Bohets H, McGowan C, Mannens G, Schroeder N, Edwards-Swanson K, Shapiro A. Clinical pharmacology of alcaftadine, a novel antihistamine for the prevention of allergic conjunctivitis. *J Ocul Pharmacol Ther*. 2011;27(2):187–95.
  42. Bonnin N, Nezzar H, Dubray C, Renault D, Olmiere C, Chiambaretta F. Plasma levels and systemic safety of 0.1% unpreserved Timolol maleate gel, 0.5% Timolol aqueous solution and 0.5% Timolol maleate gel. *J Fr Ophtalmol*. 2012;35(1):9–16.
  43. Boulton D, Balch A, Royzman K, Patel C, Berman R, Mallikaarjun S, et al. The pharmacokinetics of standard antidepressants with aripiprazole as adjunctive therapy: studies in healthy subjects and in patients with major depressive disorder. *J Psychopharmacol*. 2008;24(4):537–46.
  44. Bozik ME, Mather JL, Kramer WG, Gribkoff VK, Ingersoll EW. Safety, tolerability, and pharmacokinetics of KNS-760704 (Dexpramipexole) in healthy adult subjects. *J Clin Pharmacol*.

2011;51(8):1177–85.

45. Bramlage P, Goldis A. Bioequivalence study of three ibuprofen formulations after single dose administration in healthy volunteers. *BMC Pharmacol.* 2008;8(1):18.
46. Brennan BJ, Davies B, Cirrincione-Dall G, Morcos PN, Beryozkina A, Chappey C, et al. Safety, tolerability, and pharmacokinetics of intravenous oseltamivir: single- and multiple-dose phase I studies with healthy volunteers. *Antimicrob Agents Chemother.* 2012;56(9):4729–37.
47. Bruderer S, Äänismaa P, Homery M-C, Häusler S, Landskroner K, Sidharta PN, et al. Effect of cyclosporine and rifampin on the pharmacokinetics of macitentan, a tissue-targeting dual endothelin receptor antagonist. *The AAPS Journal.* 2011;14(1):68–78.
48. Bruggemann RJM, van Luin M, Colbers EPH, van den Dungen MW, Pharo C, Schouwenberg BJJW, et al. Effect of posaconazole on the pharmacokinetics of fosamprenavir and vice versa in healthy volunteers. *J Antimicrob Chemother.* 2010;65(10):2188–94.
49. Bunge K, Macio I, Meyn L, Noguchi L, Parniak MA, Shwartz JL, et al. The safety, persistence, and acceptability of an antiretroviral microbicide candidate UC781. *J Acquir Immune Defic Syndr.* 2012;60(4):337–43.
50. Cai Y, Chai D, Falagas ME, Vouloumanou EK, Wang R, Guo D, et al. Immediate hematological toxicity of linezolid in healthy volunteers with different body weight: a phase I clinical trial. *J Antibiot.* 2012;65:175–8.
51. Cai Y, Chai D, Pei F, Fang Y, Wang R, Liang B, et al. Single-dose pharmacokinetics and safety of iptakalim hydrochloride in Chinese healthy volunteers. *J Pharm Pharmacol.* 2012;64(3):337–43.
52. Cammu G, De Kam PJ, Demeyer I, Decoopman M, Peeters PAM, Smeets JMW, et al. Safety and tolerability of single intravenous doses of sugammadex administered simultaneously with rocuronium or vecuronium in healthy volunteers. *Br J Anaesth.* 2008;100(3):373–9.
53. Cao YJ, Flexner CW, Dunaway S, Park J-G, Klingman K, Wiggins I, et al. Effect of low-dose ritonavir on the pharmacokinetics of the CXCR4 antagonist AMD070 in healthy volunteers. *Antimicrob Agents Chemother.* 2008;52(5):1630–4.
54. Capeding RZ, Luna IA, Bomasang E, Lupisan S, Lang J, Forrat R, et al. Live-attenuated, tetravalent dengue vaccine in children, adolescents and adults in a dengue endemic country: Randomized controlled phase I trial in the Philippines. *Vaccine.* 2011;29(22):3863–72.
55. Cass RT, Brooks CD, Havrilla NA, Tack KJ, Borin MT, Young D, et al. Pharmacokinetics and safety of single and multiple doses of ACHN-490 injection administered intravenously in healthy subjects. *Antimicrob Agents Chemother.* 2011;55(12):5874–80.
56. Cech PG, Aebi T, Abdallah MS, Mpina M, Machunda EB, Westerfeld N, et al. Virosome-formulated plasmodium falciparum AMA-1 & CSP derived peptides as malaria vaccine: randomized phase Ib trial in semi-immune adults & children. *PLoS One.* 2011;6(7):e22273.
57. Chakraborty A, Roy S, Loeffler J, Chaves RL. Comparison of the pharmacokinetics, safety and tolerability of daptomycin in healthy adult volunteers following intravenous administration by 30 min infusion or 2 min injection. *J Antimicrob Chemother.* 2009;64(1):151–8.
58. Chakravarty J, Kumar S, Trivedi S, Rai VK, Singh A, Ashman JA, et al. A clinical trial to evaluate the safety and immunogenicity of the LEISH-F1+MPL-SE vaccine for use in the prevention of visceral leishmaniasis. *Vaccine.* 2011;29(19):3531–7.
59. Chandra KP, Shiwalkar A, Kotecha J, Thakkar P, Srivastava A, Chauthaiwale V, et al. Phase I clinical studies of the advanced glycation end-product (age)-breaker TRC4186. *Clin Drug Invest.* 2009;29(9):559–75.

60. Chen D, Lal R, Zomorodi K, Atluri H, Ho J, Luo W, et al. Evaluation of gabapentin enacarbil on cardiac repolarization: a randomized, double-blind, placebo- and active-controlled, crossover thorough QT/QTc study in healthy adults. *Clin Ther.* 2012;34(2):351–362.
61. Chen Y, Jiang J, Zhang J, Tortorici MA, Pithavala YK, Lu L, et al. A phase I study to evaluate the pharmacokinetics of axitinib (AG-13736) in healthy Chinese volunteers. *Int J Clin Pharmacol Ther.* 2011;49(11):679–87.
62. Chiambaretta F, Garraffo R, Elena PP, Pouliquen P, Delval L, Rigal D, et al. Tear concentrations of azithromycin following topical administration of a single dose of azithromycin 0.5%, 0.1%, and 1.5% eyedrops (T1225) in healthy volunteers. *Eur J Ophthalmol.* 2008;18(1):13–20.
63. Chilengi R, Juma R, Abdallah AM, Bashraheil M, Lodenyo H, Nyakundi P, et al. A phase I trial to evaluate the safety and pharmacokinetics of low-dose methotrexate as an anti-malarial drug in Kenyan adult healthy volunteers. *Chilengi et al. Malar J.* 2011;10(63):1–9.
64. Chinsangaram J, Honeychurch KM, Tyavanagimatt SR, Bolken TC, Jordan R, Jones KF, et al. Pharmacokinetic comparison of a single oral dose of polymorph form i versus form v capsules of the antiorthopoxvirus compound ST-246 in human volunteers. *Antimicrob Agents Chemother.* 2012;56(7):3582–6.
65. Choy G, Joshi-Hangal R, Oganessian A, Fine G, Rasmussen S, Collier J, et al. Safety, tolerability, and pharmacokinetics of amuvatinib from three phase I clinical studies in healthy volunteers. *Cancer Chemother Pharmacol.* 2012;70(1):183–90.
66. Chung DT, Chang L-W, Huang Y-H, Tsai C-Y, Ching-Hung H, King C-HR, et al. 866 TG-0054, a novel and potent stem cell mobilizer, displays excellent PK/PD and safety profile in phase I trial. *Blood.* 2009; 114L:288–90.
67. Church MK. Comparative inhibition by bilastine and cetirizine of histamine-induced wheal and flare responses in humans. *Inflamm Res.* 2011;60(12):1107–12.
68. Cirillo I, Vaccaro N, Turner K, Solanki B, Natarajan J, Redman R. pharmacokinetics, safety, and tolerability of doripenem after 0.5-, 1-, and 4-hour infusions in healthy volunteers. *J Clin Pharmacol.* 2009;49(7):798–806.
69. Clemens A, Ryn J, Sennewald R, Yamamura N, Stangier J, Feuring M, et al. Switching from enoxaparin to dabigatran etexilate: pharmacokinetics, pharmacodynamics, and safety profile. *Eur J Clin Pharmacol.* 2012;68(5):607–16.
70. Cohen CR, Brown J, Moscicki A-B, Bukusi EA, Paull JRA, Price CF, et al. A phase I randomized placebo controlled trial of the safety of 3% sp17013 gel (Vivagel®) in healthy young women administered twice daily for 14 days. *PLoS One.* 2011;6(1):e16258.
71. Combadière B, Vogt A, Mahé B, Costagliola D, Hadam S, Bonduelle O, et al. Preferential amplification of CD8 effector-T cells after transcutaneous application of an inactivated influenza vaccine: a randomized phase I trial. *PLoS One.* 2010;5(5):e10818.
72. Cox RJ, Pedersen G, Madhun AS, Svindland S, Sævik M, Breakwell L, et al. Evaluation of a virosomal H5N1 vaccine formulated with Matrix M<sup>TM</sup> adjuvant in a phase I clinical trial. *Vaccine.* 2011;29(45):8049–59.
73. Cox S, Southby J, Linet O, Tackwell K, Borin M, Perry K. Comparison of the pharmacokinetics of apricitabine in the presence and absence of ritonavir-boosted tipranavir a phase I, open-label, controlled, single-centre study. *Clin Drug Investig.* 2009;29(11):721–8.
74. Crauwels H, Vingerhoets J, Ryan R, Witek J, Anderson D. Pharmacokinetic parameters of once-daily rilpivirine following administration of efavirenz in healthy subjects. *Antivir Ther.* 2012;17:439–46.



75. Dallob A, Luo W-L, Luk JM, Ratcliffe L, Johnson-Levonas AO, Schwartz JJ, et al. The effects of laropiprant, a selective prostaglandin D2 receptor 1 antagonist, on the antiplatelet activity of clopidogrel or aspirin. *Platelets*. 2011;22(7):495–503.
76. Dalton RN, Chetty R, Stuart M, Iacona RB, Swaisland A. Effects of the src inhibitor saracatinib (AZD0530) on renal function in healthy subjects. *Anticancer Res*. 2010;30:2935–42.
77. Darwish M, Chang S, Hellriegel ET. A pharmacokinetic comparison of single doses of once-daily cyclobenzaprine extended-release 15mg and 30mg: a randomized, double-blind, two-period crossover study in healthy volunteers. *Clin Ther*. 2009;31(1):108–14.
78. De Bruijne J, Bergmann JF, Weegink CJ, van Nieuwkerk CM, de Knegt RJ, Komoda Y, et al. Safety and antiviral activity of JTK-652: a novel HCV infection inhibitor. *Antivir Ther*. 2010;15:765–73.
79. De Leede LGJ, Humphries JE, Bechet AC, Van Hoogdalem EJ, Verrijk R, Spencer DG. Novel controlled-release Lemna-Derived IFN- $\alpha$ 2b (Locteron): pharmacokinetics, pharmacodynamics, and tolerability in a phase I clinical trial. *J Interferon Cytokine Res*. 2008;28(2):113–22.
80. Del Corral A, Dutreix C, Huntsman-Labed A, Lorenzo S, Morganroth J, Harrell R, et al. Midostaurin does not prolong cardiac repolarization defined in a thorough electrocardiogram trial in healthy volunteers. *Cancer Chemother Pharmacol*. 2012;69(5):1255–63.
81. Derks M, Anzures-Cabrera J, Phelan M. Safety, Tolerability and pharmacokinetics of dalcetrapib following single and multiple ascending doses in healthy subjects a randomized, double-blind, placebo-controlled, phase I study. *Clin Drug Investig*. 2011;31(5):325–35.
82. Derks M, Kawamura H, Abt M, Meneses-Lorente G, Phelan M, Ishikawa T. effects of food intake on the pharmacokinetic properties of dalcetrapib: findings from three phase I, single-dose crossover studies in healthy volunteers. *Clin Ther*. 2011;33(6):754–65.
83. Dietrich H, Hu K, Ruffin M, Song D, Bouillaud E, Wang Y, et al. Safety, tolerability, and pharmacokinetics of a single dose of pasireotide long-acting release in healthy volunteers: a single-center phase I study. *Eur J Endocrinol*. 2012;166(5):821–8.
84. Dingemans J, van Giersbergen PL, Patat A, Nilsson PN. Mutual pharmacokinetic interactions between bosentan and lopinavir/ritonavir in healthy participants. *Antivir Ther*. 2010;15(157-163).
85. Dmochowski RR, Newman DK, Sand PK, Rudy DC, Caramelli KE, Thomas H, et al. Pharmacokinetics of oxybutynin chloride topical gel effects of application site, showering, sunscreen and person-to-person transference. *Clin Drug Investig*. 2011;31(8):559–71.
86. Dodds Ashley ES, Varkey JB, Krishna G, Vickery D, Ma L, Yu X, et al. Pharmacokinetics of Posaconazole Administered Orally or by Nasogastric Tube in Healthy Volunteers. *Antimicrob Agents Chemother*. 2009 May 11;53(7):2960–4.
87. Donath F, Braeter M, Feustel C. The influence of propiverine hydrochloride on cardiac repolarization in healthy women and cardiac male patients. *Int J Clin Pharmacol Ther* 2011; 49: 353-65.
88. Dooley KE, Bliven-Sizemore EE, Weiner M, Lu Y, Nuermberger EL, Hubbard WC, et al. Safety and pharmacokinetics of escalating daily doses of the antituberculosis drug rifapentine in healthy volunteers. *Clin Pharmacol Ther*. 2012;91(5):881–8.
89. Dooley KE, Park J-G, Swindells S, Allen R, Haas DW, Cramer Y, et al. Safety, tolerability, and pharmacokinetic interactions of the antituberculous agent TMC207 (bedaquiline) with efavirenz in healthy volunteers: AIDS clinical trials group study A5267. *J Acquir Immune Defic Syndr*. 2012;59(5):455–62.
90. Driehuys B, Martinez-Jimenez S, Cleveland ZI, Metz GM, Beaver DM, Nouis JC, et al. Chronic obstructive pulmonary disease: safety and tolerability of hyperpolarized  $^{129}\text{Xe}$  MR imaging in healthy

volunteers and patients. *Radiology*. 2012;262(1):279–89.

91. Durbin AP, Whitehead SS, Shaffer D, Elwood D, Wanionek K, Thumar B, et al. A single dose of the DENV-1 Candidate Vaccine rDEN1Δ30 is strongly immunogenic and induces resistance to a second dose in a randomized trial. *PLoS Negl Trop Dis*. 2011;5(8):e1267.
92. Ehrlich HJ, Müller M, Kollaritsch H, Pinl F, Schmitt B, Zeitlinger M, et al. Pre-vaccination immunity and immune responses to a cell culture-derived whole-virus H1N1 vaccine are similar to a seasonal influenza vaccine. *Vaccine*. 2012;30(30):4543–51.
93. El-Kamary SS, Billington M, Deitz S, Colby E, Rhinehart H, Wu Y, et al. safety and tolerability of the easy vax clinical epidermal electroporation system in healthy adults. *Mol Ther*. 2011;20(1):214–20.
94. Esen M, Kreamsner PG, Schleucher R, Gässler M, Imoukhuede EB, Imbault N, et al. Safety and immunogenicity of GMZ2 — a MSP3–GLURP fusion protein malaria vaccine candidate. *Vaccine*. 2009;27(49):6862–8.
95. Esseku F, Joshi A, Oyegbile Y, Edowhorhu G, Gbadero D, Adeyeye M. A randomized phase I bioequivalence clinical trial of a pediatric fixed-dose combination antiretroviral reconstitutable suspension in healthy adult volunteers. *Antivir Ther*. 2012;10:1–16.
96. Finn AL, Vasishth N, Stark JG, Gever LN, Tagarro I. Dose proportionality and pharmacokinetics of fentanyl buccal soluble film in healthy subjects a phase I, open-label, three-period, crossover study. *Clin Drug Investig*. 2012;32(1):63–71.
97. Firbas C, Boehm T, Buerger V, Schuller E, Sabarth N, Jilma B, et al. Immunogenicity and safety of different injection routes and schedules of IC41, a Hepatitis C virus (HCV) peptide vaccine. *Vaccine*. 2010;28(12):2397–407.
98. Frencck RW, Belshe R, Brady RC, Winokur PL, Campbell JD, Treanor J, et al. Comparison of the immunogenicity and safety of a split-virion, inactivated, trivalent influenza vaccine (Fluzone®) administered by intradermal and intramuscular route in healthy adults. *Vaccine*. 2011;29(34):5666–74.
99. Frey R, Mück W, Unger S, Artmeier-Brandt U, Weimann G, Wensing G. Single-dose pharmacokinetics, pharmacodynamics, tolerability, and safety of the soluble guanylate cyclase stimulator BAY 63-2521: an ascending-dose study in healthy male volunteers. *J Clin Pharmacol*. 2008;48(8):926–34.
100. Frey R, Mück W, Unger S, Artmeier-Brandt U, Weimann G, Wensing G. Pharmacokinetics, pharmacodynamics, tolerability, and safety of the soluble guanylate cyclase activator cinaciguat (BAY 58-2667) in healthy male volunteers. *J Clin Pharmacol*. 2008;48(12):1400–10.
101. Frey SE, Houghton M, Coates S, Abrignani S, Chien D, Rosa D, et al. Safety and immunogenicity of HCV E1E2 vaccine adjuvanted with MF59 administered to healthy adults. *Vaccine*. 2010;28(38):6367–73.
102. Furlan A, Monzani V, Reznikov LL, Leoni F, Fossati G, Modena D, et al. Pharmacokinetics, safety and inducible cytokine responses during a phase I trial of the oral histone deacetylase inhibitor ITF2357 (givinostat). *Mol Med*. 2011;17(5-6):353–62.
103. García F, Bernaldo de Quirós JCL, Gómez CE, Perdiguero B, Nájera JL, Jiménez V, et al. Safety and immunogenicity of a modified pox vector-based HIV/AIDS vaccine candidate expressing Env, Gag, Pol and Nef proteins of HIV-1 subtype B (MVA-B) in healthy HIV-1-uninfected volunteers: a phase I clinical trial (RISVAC02). *Vaccine*. 2011;29(46):8309–16.
104. Gardin A, Kucher K, Kiese B, Appel-Dingemanse S. Cannabinoid receptor agonist 13, a novel cannabinoid agonist: first in human pharmacokinetics and safety. *Drug Metab Dispos*. 2009;37(4):827–33.

105. Garg V, van Heeswijk R, Eun Lee J, Alves K, Nadkarni P, Luo X. Effect of telaprevir on the pharmacokinetics of cyclosporine and tacrolimus. *Hepatology*. 2011;54(1):20–7.
106. Ginsberg AM, Laurenzi MW, Rouse DJ, Whitney KD, Spigelman MK. Assessment of the effects of the nitroimidazo-oxazine pa-824 on renal function in healthy subjects. *Antimicrob Agents Chemother*. 2009;53(9):3726–33.
107. Glenn GM, Thomas DN, Poffenberger KL, Flyer DC, Ellingsworth LR, Andersen BH, et al. Safety and immunogenicity of an influenza vaccine A/H5N1 (A/Vietnam/1194/2004) when coadministered with a heat-labile enterotoxin (LT) adjuvant patch. *Vaccine*. 2009;27:G60–G66.
108. Godfrey AR, DiGiacinto J, Davis MW. Single-dose bioequivalence of 105-mg fenofibric acid tablets versus 145-mg fenofibrate tablets under fasting and fed conditions: a report of two phase I, open-label, single-dose, randomized, crossover clinical trials. *Clin Ther*. 2011;33(6):766–75.
109. Goepfert PA, Elizaga ML, Sato A, Qin L, Cardinali M, Hay CM, et al. Phase I safety and immunogenicity testing of dna and recombinant modified vaccinia ankara vaccines expressing HIV-1 virus-like particles. *J Infect Dis*. 2011;203(5):610–9.
110. Goldberg MR, Wong SL, Shaw J-P, Kitt MM, Barriere SL. Single-Dose Pharmacokinetics and Tolerability of Telavancin in Elderly Men and Women. *Pharmacotherapy*. 2010;30(8):807–11.
111. Gorse GJ, Baden LR, Wecker M, Newman MJ, Ferrari G, Weinhold KJ, et al. Safety and immunogenicity of cytotoxic T-lymphocyte poly-epitope, DNA plasmid (EP HIV-1090) vaccine in healthy, human immunodeficiency virus type 1 (HIV-1)-uninfected adults. *Vaccine*. 2008;26(2):215–23.
112. Grabowski B, Lee RD. Absorption, distribution, metabolism and excretion of [14C]dexlansoprazole in healthy male subjects. *Clin Drug Investig*. 2012;32(5):319–32.
113. Grabstein K, Nairn N, Wang A, Graddis T, Jusko W, Burge D. Phase I studies of the safety, pharmacokinetics and pharmacodynamics of subcutaneous PEGylated interferon-beta in healthy volunteers (PO4.122). *Neurology*. 2012;78(Meeting Abstracts 1):P04.122.
114. Graefe-Mody EU, Brand T, Ring A, Withopf B, Stangier J, Iovino M, et al. Effect of linagliptin on the pharmacokinetics and pharmacodynamics of warfarin in healthy volunteers. *Int J Clin Pharmacol Ther*. 2011; 49:300-10.
115. Graham RA, Lum BL, Morrison G, Chang I, Jorga K, Dean B, et al. A single dose mass balance study of the hedgehog pathway inhibitor vismodegib (GDC-0449) in humans using accelerator mass spectrometry. *Drug Metab Dispos*. 2011;39(8):1460–7.
116. Greenberg RN, Marbury TC, Foglia G, Warny M. Phase I dose finding studies of an adjuvanted *Clostridium difficile* toxoid vaccine. *Vaccine*. 2012;30(13):2245–9.
117. Greenblatt DJ, Harmatz JS, Walsh JK, Luthringer R, Staner L, Otmani S, et al. Pharmacokinetic profile of SKP-1041, a modified release formulation of zaleplon. *Biopharm Drug Dispos*. 2011;32(9):489–97.
118. Groth N, Montomoli E, Gentile C, Manini I, Bugarini R, Podda A. Safety, tolerability and immunogenicity of a mammalian cell-culture-derived influenza vaccine: A sequential Phase I and Phase II clinical trial. *Vaccine*. 2009;27(5):786–91.
119. Gupta P, Alvey C, Wang R, Dowty ME, Fahmi OA, Walsky RL, et al. Lack of effect of tofacitinib (CP-690,550) on the pharmacokinetics of the CYP3A4 substrate midazolam in healthy volunteers: confirmation of in vitro data. *Br J Clin Pharmacol*. 2012;74(1):109–15.
120. Hafner V, Rutsch C, Ding R, Heinrich T, Diedrichs L, Schmidt-Gayk H, et al. Calcium balance during calcitriol and paricalcitol administration in healthy humans. *Int J Clin Pharmacol Ther*. 2008;46(3):131–5.

121. Halasa NB, Gerber MA, Chen Q, Wright PF, Edwards KM. Safety and immunogenicity of trivalent inactivated influenza vaccine in infants. *J Infect Dis*. 2008;197(10):1448–54.
122. Harb G, Lebel F, Battikha J, Thackara JW. Safety and pharmacokinetics of subcutaneous ceftriaxone administered with or without recombinant human hyaluronidase (rHuPH20) versus intravenous ceftriaxone administration in adult volunteers. *Curr Med Res Opin*. 2010;26(2):279–88.
123. Hardmeier M, Zimmermann R, Rüegg S, Pflüger M, Deuster S, Suter K, et al. Intranasal midazolam: pharmacokinetics and pharmacodynamics assessed by quantitative EEG in healthy volunteers. *Clin Pharmacol Ther*. 2012;91(5):856–62.
124. Harro C, Sack D, Bourgeois AL, Walker R, DeNearing B, Feller A, et al. A combination vaccine consisting of three live attenuated enterotoxigenic escherichia coli strains expressing a range of colonization factors and heat-labile toxin subunit b is well tolerated and immunogenic in a placebo-controlled double-blind phase I trial in healthy adults. *Clin Vaccine Immunol*. 2011;18(12):2118–27.
125. Harro CD, Betts RF, Hartzel JS, Onorato MT, Lipka J, Smugar SS, et al. The immunogenicity and safety of different formulations of a novel *Staphylococcus aureus* vaccine (V710): results of two phase I studies. *Vaccine*. 2012;30(9):1729–36.
126. Hawkrigde T, Scriba TJ, Gelderbloem S, Smit E, Tameris M, Moyo S, et al. Safety and immunogenicity of a new tuberculosis vaccine, MVA85A, in healthy adults in south africa. *J Infect Dis*. 2008;198(4):544–52.
127. Heinig R, Weimann B, Dietrich H, Boëtcher M-F. Pharmacokinetics of a new orodispersible tablet formulation of vardenafil results of three clinical trials. *Clin Drug Investig*. 2011;31(1):27–41.
128. Heinrich T, Heidt H, Hafner V, Schmidt-Gayk H, Jenetzky E, Walter-Sack I, et al. Calcium load during administration of calcium carbonate or sevelamer in individuals with normal renal function. *Nephrol Dial Transplant*. 2008;23(9):2861–7.
129. Herrera S, Fernandez OL, Vera O, Cardenas W, Ramirez O, Palacios R, et al. Phase I safety and immunogenicity trial of plasmodium vivax cs derived long synthetic peptides adjuvanted with montanide ISA 720 or montanide ISA 51. *Am J Trop Med Hyg*. 2011;84(2 Suppl):12–20.
130. Hiki N, Kaminishi M, Hasunuma T, Nakamura M, Nomura S, Yahagi N, et al. A phase I study evaluating tolerability, pharmacokinetics, and preliminary efficacy of l-menthol in upper gastrointestinal endoscopy. *Clin Pharmacol Ther*. 2011;90(2):221–8.
131. Hoft DF, Blazevic A, Abate G, Hanekom WA, Kaplan G, Soler JH, et al. A new recombinant bacille calmette-guérin vaccine safely induces significantly enhanced tuberculosis-specific immunity in human volunteers. *J Infect Dis*. 2008;198(10):1491–501.
132. Hong-ji X, Wei L, Jian-hua X. Adverse reaction and immunogenicity induced by domestic freeze-dried live attenuated measles-mumps-rubella combined vaccine. *Chin J Biologicals*. 2008;21(12):1111–4.
133. Horsmans Y, Hu K, Ruffin M, Wang Y, Song D, Bouillaud E, et al. Effect of hepatic impairment on the pharmacokinetics of pasireotide (SOM230): results from a multicenter phase I study. *J Clin Pharmacol*. 2012 Apr;52(4):552–8.
134. Hotho DM, de Bruijne J, O'Farrell AM, Boyea T, Li J, Bracken M, et al. Pharmacokinetics and antiviral activity of PHX1766, a novel HCV protease inhibitor, using an accelerated phase I study design. *Antivir Ther*. 2012;17:365–75.
135. Hu J, Chen Z, Gu J, Wan M, Shen Q, Kieny M-P, et al. Safety and immunogenicity of a malaria vaccine, plasmodium falciparum AMA-1/MSP-1 chimeric protein formulated in montanide ISA 720 in healthy adults. *PLoS One*. 2008;3(4):e1952.
136. Hu X, Miller L, Richman S, Hitchman S, Glick G, Liu S, et al. A novel PEGylated interferon beta-

- 1a for multiple sclerosis: safety, pharmacology, and biology. *J Clin Pharmacol.* 2012;52(6):798–808.
137. Huang F, Scholl P, Huang DB, MacGregor TR, Taub ME, Vinisko R, et al. Concomitant administration of BILR 355/r with emtricitabine/tenofovir disoproxil fumarate increases exposure to emtricitabine and tenofovir: a randomized, open-label, prospective study. *Basic Clin Pharmacol Toxicol.* 2010;108(3):163–70.
138. Huang F, Scholl P, Huang DB, MacGregor TR, Vinisko R, Castles MA, et al. Coadministration with lopinavir and ritonavir decreases exposure to BILR 355, a nonnucleoside reverse transcriptase inhibitor, in healthy volunteers. *J Clin Pharmacol.* 2011;51(7):1061–70.
139. Huennemeyer A, Nassr N, Bredenbröker D, Lahu G. Supra-therapeutic doses of roflumilast have no effect on cardiac repolarization in healthy subjects. *Expert Opin Drug Saf.* 2011;10(4):509–19.
140. Hussey EK, Dobbins RL, Stoltz RR, Stockman NL, O'Connor-Semmes RL, Kapur A, et al. Multiple-dose pharmacokinetics and pharmacodynamics of sergliflozin etabonate, a novel inhibitor of glucose reabsorption, in healthy overweight and obese subjects: a randomized double-blind study. *J Clin Pharmacol.* 2010;50(6):636–46.
141. Hüttner S, Graefe-Mody EU, Withopf B, Ring A, Dugi KA. Safety, tolerability, pharmacokinetics, and pharmacodynamics of single oral doses of BI 1356, an inhibitor of dipeptidyl peptidase 4, in healthy male volunteers. *J Clin Pharmacol.* 2008;48(10):1171–8.
142. Ikeno D, Kimachi K, Kino Y, Harada S, Yoshida K, Tochihara S, et al. Immunogenicity of an inactivated adjuvanted whole-virion influenza A (H5N1, NIBRG-14) vaccine administered by intramuscular or subcutaneous injection. *Microbiol Immunol.* 2010;54(2):81–8.
143. Ishizuka H, Yoshiba S, Okabe H, Yoshihara K. Clinical pharmacokinetics of laninamivir, a novel long-acting neuraminidase inhibitor, after single and multiple inhaled doses of its prodrug, CS-8958, in healthy male volunteers. *J Clin Pharmacol.* 2010;50(11):1319–29.
144. Iwamoto M, Wenning L, Petry A, Laethem M, De Smet M, Kost J, et al. Safety, tolerability, and pharmacokinetics of raltegravir after single and multiple doses in healthy subjects. *Clin Pharm Ther.* 2008;83(2):293–9.
145. Jackson RL, Greiwe JS, Desai PB, Schwen RJ. Single-dose and steady-state pharmacokinetic studies of S-equol, a potent nonhormonal, estrogen receptor  $\beta$ -agonist being developed for the treatment of menopausal symptoms. *Menopause.* 2010; 18:185-193.
146. Jaoko W, Karita E, Kayitenkore K, Omosa-Manyonyi G, Allen S, Than S, et al. Safety and immunogenicity study of multiclade hiv-1 adenoviral vector vaccine alone or as boost following a multiclade HIV-1 DNA vaccine in Africa. *PLoS One.* 2010;5(9):e12873.
147. Jaoko W, Nakwagala FN, Anzala O, Manyonyi GO, Birungi J, Nanvubya A, et al. Safety and immunogenicity of recombinant low-dosage HIV-1 A vaccine candidates vectored by plasmid pTHr DNA or modified vaccinia virus Ankara (MVA) in humans in East Africa. *Vaccine.* 2008;26(22):2788–95.
148. Jarrahian C, Zehrung D, Saxon E, Griswold E, Klaff L. Clinical performance and safety of the ID adapter, a prototype intradermal delivery technology for vaccines, drugs, and diagnostic tests. *Procedia Vaccinol.* 2012;6:125–33.
149. Jian-lin H, Yun-feng P, Yu-qiong W, Hui S, Jie-ruo G. Phase I clinical tolerability of imrecoxib. *Chin Pharm J.* 2011;46(21):1670–3.
150. Jiang J, Tian L, Huang Y, Li Y, Xu L. Pharmacokinetic and pharmacodynamic characteristics of aranidipine sustained-release, enteric-coated tablets in healthy chinese men: a phase I, randomized, open-label, single- and multiple-dose study. *Clin Ther.* 2008;30(7):1290–9.
151. Jiang J, Tian L, Huang Y, Xie S, Xu L, Liu H, et al. Pharmacokinetic profiles of

hydrochlorothiazide alone and in combination with benazepril or valsartan in healthy Chinese volunteers: evaluation of the potential interaction. *Int J Clin Pharm Ther*. 2011;49:756–64.

152. Jilma-Stohlawetz P, Kursten FW, Walasek C, Horvath M, Leitner G, List J, et al. Safety of a universal, virus-inactivated and prion-depleted, pharmaceutical-quality plasma: a randomized, double-blind, clinical trial in healthy volunteers. *Transfusion*. 2011;51(6):1228–40.

153. Jin X, Newman MJ, De-Rosa S, Cooper C, Thomas E, Keefer M, et al. A novel HIV T helper epitope-based vaccine elicits cytokine-secreting HIV-specific CD4<sup>+</sup> T cells in a phase I clinical trial in HIV-uninfected adults. *Vaccine*. 2009;27(50):7080–6.

154. Johannsson G, Bergthorsdottir R, Nilsson AG, Lennernas H, Hedner T, Skrtic S. Improving glucocorticoid replacement therapy using a novel modified-release hydrocortisone tablet: a pharmacokinetic study. *Eur J Endocrinol*. 2009;161(1):119–30.

155. Johnson PV, Blair BM, Zeller S, Kotton CN, Hohmann EL. Attenuated *Listeria monocytogenes* vaccine vectors expressing Influenza A nucleoprotein: preclinical evaluation and oral inoculation of volunteers. *Microbiol Immunol*. 2011;55(5):304–17.

156. Kakuda TN, Abel S, Davis J, Hamlin J, Scholler-Gyure M, Mack R, et al. Pharmacokinetic interactions of maraviroc with darunavir-ritonavir, etravirine, and etravirine-darunavir-ritonavir in healthy volunteers: results of two drug interaction trials. *Antimicrob Agents Chemother*. 2011;55(5):2290–6.

157. Kalams SA, Parker S, Jin X, Elizaga M, Metch B, Wang M, et al. Safety and immunogenicity of an HIV-1 gag DNA vaccine with or without IL-12 and/or IL-15 plasmid cytokine adjuvant in healthy, HIV-1 uninfected adults. *PLoS One*. 2012;7(1):e29231.

158. Karron RA, Talaat K, Luke C, Callahan K, Thumar B, DiLorenzo S, et al. Evaluation of two live attenuated cold-adapted H5N1 influenza virus vaccines in healthy adults. *Vaccine*. 2009;27(36):4953–60.

159. Ke-jian S, Li S, Yi-min M, Jin-fang S. Phase I tolerability trial of polyethylene glycol thymosin Alpha-1 injection. *Chin J New Drugs*. 2012;19(6):476–179.

160. Keefer MC, Frey SE, Elizaga M, Metch B, De Rosa SC, Barroso PF, et al. A phase I trial of preventive HIV vaccination with heterologous poxviral-vectors containing matching HIV-1 inserts in healthy HIV-uninfected subjects. *Vaccine*. 2011;29(10):1948–58.

161. Keefer MC, Gilmour J, Hayes P, Gill D, Kopycinski J, Cheeseman H, et al. A phase I double blind, placebo-controlled, randomized study of a multigenic HIV-1 adenovirus subtype 35 vector vaccine in healthy uninfected adults. *PLoS One*. 2012;7(8):e41936.

162. Keiser PB, Biggs-Cicatelli S, Moran EE, Schmiel DH, Pinto VB, Burden RE, et al. A phase 1 study of a meningococcal native outer membrane vesicle vaccine made from a group B strain with deleted lpxL1 and synX, over-expressed factor H binding protein, two PorAs and stabilized OpcA expression. *Vaccine*. 2011;29(7):1413–20.

163. Keitel WA, Campbell JD, Treanor JJ, Walter EB, Patel SM, He F, et al. Safety and immunogenicity of an inactivated influenza A/H5N1 vaccine given with or without aluminum hydroxide to healthy adults: results of a phase I–II randomized clinical trial. *J Infect Dis*. 2008;198(9):1309–16.

164. Keitel WA, Groth N, Lattanzi M, Praus M, Hilbert AK, Borkowski A, et al. Dose ranging of adjuvant and antigen in a cell culture H5N1 influenza vaccine: safety and immunogenicity of a phase 1/2 clinical trial. *Vaccine*. 2010;28(3):840–8.

165. Keitel WA, Treanor JJ, El Sahly HM, Evans TG, Kopper S, Whitlow V, et al. Evaluation of a plasmid DNA-based anthrax vaccine in rabbits, nonhuman primates and healthy adults. *Hum Vaccin*. 2009;5(8):536–44.

166. Kennedy JS, Gurwith M, Dekker CL, Frey SE, Edwards KM, Kenner J, et al. Safety and

- immunogenicity of LC16m8, an attenuated smallpox vaccine in vaccine-naive adults. *J Infect Dis*. 2011;204(9):1395–402.
167. Kessler K, Goudeva L, Heuft H-G. Lenograstim with or without dexamethasone for neutrophil mobilization in healthy donors: short-term kinetics of white blood cells and effects of granulocyte apheresis. *J Clin Apher*. 2011;26(6):338–46.
168. Khosravan R, Kukulka MJ, Wu J-T, Joseph-Ridge N, Vernillet L. The effect of age and gender on pharmacokinetics, pharmacodynamics, and safety of febuxostat, a novel nonpurine selective inhibitor of xanthine oxidase. *J Clin Pharmacol*. 2008;48(9):1014–24.
169. Kienzler J-L, Gold M. Diclofenac potassium 12.5 mg liquid capsules: earlier and higher exposure to diclofenac A fasted, single-dose, comparative, bioavailability study versus diclofenac potassium 12.5 mg tablets. *Int J Clin Pharmacol Ther*. 2012;50(6):438–44.
170. Kim H, Bae SK, Park S-J, Shim E-J, Kim H-S, Shon J-H, et al. Effects of woohwangcheongsimwon suspension on the pharmacokinetics of bupropion and its active metabolite, 4-hydroxybupropion, in healthy subjects. *Br J Clin Pharmacol*. 2010;70(1):126–31.
171. Kosoglou T, Reyderman L, Tiessen RG, Vliet AA, Fales RR, Keller R, et al. Pharmacodynamics and pharmacokinetics of the novel PAR-1 antagonist vorapaxar (formerly SCH 530348) in healthy subjects. *Eur J Clin Pharmacol*. 2011;68(3):249–58.
172. Krauss RM, Wojnooski K, Orr J, Geaney JC, Pinto CA, Liu Y, et al. Changes in lipoprotein subfraction concentration and composition in healthy individuals treated with the CETP inhibitor anacetrapib. *J Lipid Res*. 2011;53(3):540–7.
173. Krishna G, Ma L, Martinho M, O'Mara E. Single-dose phase I study to evaluate the pharmacokinetics of posaconazole in new tablet and capsule formulations relative to oral suspension. *Antimicrob Agents Chemother*. 2012;56(8):4196–201.
174. Krishna G, Ma L, Martinho M, Preston RA, O'Mara E. A new solid oral tablet formulation of posaconazole: a randomized clinical trial to investigate rising single- and multiple-dose pharmacokinetics and safety in healthy volunteers. *J Antimicrob Chemother*. 2012;67(11):2725–30.
175. Krishna G, Vickery D, Ma L, Yu X, Noren C, Power E, et al. Lack of pharmacokinetic drug interaction between oral posaconazole and caspofungin or micafungin. *J Clin Pharmacol*. 2011;51(1):84–92.
176. Krishnan SM, Zhang Y. Relative bioavailability of lisdexamfetamine 70-mg capsules in fasted and fed healthy adult volunteers and in solution: a single-dose, crossover pharmacokinetic study. *J Clin Pharmacol*. 2008;48(3):293–302.
177. Krishnan SM, Stark JG. Multiple daily-dose pharmacokinetics of lisdexamfetamine dimesylate in healthy adult volunteers. *Curr Med Res Opin*. 2008;24(1):33–40.
178. Krishnaswami S, Kudlacz E, Wang R, Chan G. A supratherapeutic dose of the janus kinase inhibitor tasocitinib (CP-690,550) does not prolong QTC interval in healthy participants. *J Clin Pharmacol*. 2011;51(9):1256–63.
179. Kubitzka D, Becka M, Mück W, Schweser S. Effect of co-administration of rivaroxaban and clopidogrel on bleeding time, pharmacodynamics and pharmacokinetics: a phase I study. *Pharmaceuticals*. 2012;5(12):279–96.
180. Kumagai Y, Fujita T, Ozaki M, Yokota S, Maeda M, Shida M, et al. Safety, tolerability and pharmacokinetics of tas-108, a novel anti-oestrogen, in healthy post-menopausal Japanese women: a phase I single oral dose study. *Basic Clin Pharmacol Toxicol*. 2009;104(5):352–9.
181. Lahu G, Nassr N, Herzog R, Elmlinger M, Ruth P, Hinder M, et al. Effect of steady-state enoxacin

- on single-dose pharmacokinetics of roflumilast and roflumilast n-oxide. *J Clin Pharmacol*. 2011;51(4):586–93.
182. Lai E, Waters MG, Tata JR, Radziszewski W, Perevozskaya I, Zheng W, et al. Effects of a niacin receptor partial agonist, MK-0354, on plasma free fatty acids, lipids, and cutaneous flushing in humans. *J Clin Lipidol*. 2008;2(5):375–83.
183. Lal R, Sukbuntherng J, Ho J, Cundy KC. A phase I, single-dose study of the disposition of <sup>14</sup>C-radiolabeled gabapentin enacarbil in healthy male volunteers. *Int. J Clin Pharmacol Ther*. 2011; 49:109–15.
184. Lamson MJ, Sitki-Green D, Wannarka GL, Mesa M, Andrews P, Pellock J. Pharmacokinetics of diazepam administered intramuscularly by autoinjector versus rectal gel in healthy subjects a phase I, randomized, open-label, single-dose, crossover, single-centre study. *Clin Drug Investig*. 2011;31(8):585–97.
185. Lanata CF, Andrade T, Gil AI, Terrones C, Valladolid O, Zambrano B, et al. Immunogenicity and safety of tetravalent dengue vaccine in 2–11 year-olds previously vaccinated against yellow fever: Randomized, controlled, phase II study in Piura, Peru. *Vaccine*. 2012;30(41):5935–41.
186. Landau Z, Novotny MJ, Preston GM, Wright K, Freeman T, Dai H, et al. Pharmacokinetics, pharmacodynamics, tolerability, and safety of a novel sorbitol dehydrogenase inhibitor in healthy participants. *J Clin Pharmacol*. 2010;50(5):521–30.
187. Lang RA, Egli-Gany D, Brill FHH, Böttrich JG, Breuer M, Breuer B, et al. Transdermal absorption of ethanol- and 1-propanol-containing hand disinfectants. *Langenbecks Arch Surg*. 2010;396(7):1055–60.
188. Langley JM, Frenette L, Ferguson L, Riff D, Sheldon E, Risi G, et al. Safety and cross-reactive immunogenicity of candidate as03- $\alpha$ adjuvanted prepandemic h5n1 influenza vaccines: a randomized controlled phase 1/2 trial in adults. *J Infect Dis*. 2010;201(11):1644–53.
189. Lasseter KC, Dilzer S, Jansat JM, Garcia Gil E, Caracta CF, Ortiz S. Safety and pharmacokinetics of multiple doses of acridinium bromide administered twice daily in healthy volunteers. *Pulm Pharmacol Ther*. 2012;25(2):193–9.
190. Lasseter KC, Shaughnessy L, Cummings D, Pezzullo JC, Wargin W, Gagnon R, et al. Ghrelin agonist (TZP-101): safety, pharmacokinetics and pharmacodynamic evaluation in healthy volunteers: a phase I, first-in-human study. *J Clin Pharmacol*. 2008;48(2):193–202.
191. Lasseter KC, Aubets J, Chuecos F, Gil EG. Acridinium bromide, a long-acting antimuscarinic, does not affect QT interval in healthy subjects. *J Clin Pharmacol*. 2011;51(6):923–32.
192. Ledgerwood JE, Pierson TC, Hubka SA, Desai N, Rucker S, Gordon IJ, et al. A west nile virus DNA vaccine utilizing a modified promoter induces neutralizing antibody in younger and older healthy adults in a phase I clinical trial. *J Infect Dis*. 2011;203(10):1396–404.
193. Ledgerwood J, Wei C-J, Hu Z, Gordon I, Enama ME, Hendel CS, et al. DNA priming and influenza vaccine immunogenicity: two phase 1 open label randomised clinical trials. *Lancet Infect Dis*. 11:916–24.
194. Lee HW, Lim M, Seong SJ, Lee J, Park J, Seo JJ, et al. A phase I study to characterize the multiple-dose pharmacokinetics, pharmacodynamics and safety of new enteric-coated triflusal formulations in healthy male volunteers. *Expert Opin Drug Metab Toxicol*. 2011;7(12):1471–9.
195. Lee JE, van Heeswijk R, Alves K, Smith F, Garg V. Effect of the Hepatitis C Virus Protease Inhibitor Telaprevir on the Pharmacokinetics of Amlodipine and Atorvastatin. *Antimicrob Agents Chemother*. 2011 Aug 8;55(10):4569–74.



196. Lenney W, Edenborough F, Kho P, Kovarik JM. Lung deposition of inhaled tobramycin with eFlow rapid/LC Plus jet nebuliser in healthy and cystic fibrosis subjects. *J Cyst Fibros*. 2011;10(1):9–14.
197. Leroux-Roels I, Leroux-Roels G, Clement F, Vandepapeliere P, Vassilev V, Ledent E, et al. A phase 1/2 clinical trial evaluating safety and immunogenicity of a varicella zoster glycoprotein E subunit vaccine candidate in young and older adults. *J Infect Dis*. 2012;206(8):1280–90.
198. Leroux-Roels I, Forgue S, De Boever F, Clement F, Demoitie M-A, Mettens P, et al. Improved CD4+ T cell responses to Mycobacterium tuberculosis in PPD-negative adults by M72/AS01 as compared to the M72/AS02 and Mtb72F/AS02 tuberculosis candidate vaccine formulations: a randomized trial. *Vaccine*. Epub 2012. doi: 10.1016/j.vaccine.2012.05.035
199. Levie K, Leroux-Roels I, Hoppenbrouwers K, Kervyn A, Vandermeulen C, Forgue S, et al. An adjuvanted, low-dose, pandemic influenza A (H5N1) vaccine candidate is safe, immunogenic, and induces cross-reactive immune responses in healthy adults. *J Infect Dis*. 2008;198(5):642–9.
200. Lewis DJ, Fraser CA, Mahmoud AN, Wiggins RC, Woodrow M, Cope A, et al. Phase I randomised clinical trial of an hiv-1cn54, clade c, trimeric envelope vaccine candidate delivered vaginally. *PLoS One*. 2011;6(9):e25165.
201. Li H, Xu K, Wang Y, Zhang H, Li T, Meng L, et al. Phase I clinical study of edaravone in healthy chinese volunteers safety and pharmacokinetics of single or multiple intravenous infusions. *Drugs R D*. 2012;12(2):65–70.
202. Li X, Li J, Yan H, Hou S, Qian W, Chen Y, et al. Pharmacokinetic and pharmacodynamic study of LFA3Ig fusion protein in healthy volunteers and patients with psoriasis. *Acta Pharmacol Sinica*. 2008;29(9):1077–85.
203. Li Y-P, Liang Z-L, Gao Q, Huang L-R, Mao Q-Y, Wen S-Q, et al. Safety and immunogenicity of a novel human Enterovirus 71 (EV71) vaccine: A randomized, placebo-controlled, double-blind, phase I clinical trial. *Vaccine*. 2012;30(22):3295–303.
204. Lim CBS, Schug SA, Sunderland VB, Paech MJ, Liu Y. A Phase I pharmacokinetic and bioavailability study of a sublingual fentanyl wafer in healthy volunteers. *Anesth Analg*. 2012;115: 554-59.
205. Lim KS, Kim J-R, Choi Y-J, Shin K-H, Kim K-P, Hong J-H, et al. Pharmacokinetics, pharmacodynamics, and tolerability of the dipeptidyl peptidase IV inhibitor LC15-0444 in healthy Korean men: A dose—block-randomized, double-blind, placebo-controlled, ascending single-dose, phase I study. *Clin Ther*. 2008;30(10):1817–30.
206. Ling J, Lyn S, Xu Z, Achira M, Bouman-Thio E, Shishido A, et al. Lack of racial differences in the pharmacokinetics of subcutaneous golimumab in healthy japanese and caucasian male subjects. *J Clin Pharmacol*. 2010;50(7):792–802.
207. Loew-Baselli A, Pavlova BG, Fritsch S, Poellabauer EM, Draxler W, Kistner O, et al. A non-adjuvanted whole-virus H1N1 pandemic vaccine is well tolerated and highly immunogenic in children and adolescents and induces substantial immunological memory. *Vaccine*. 2012;30(41):5956–66.
208. Lorenzini KI, Besson M, Daali Y, Salomon D, Dayer P, Desmeules J. Validation of the simplified uvb model to assess the pharmacodynamics of analgesics in healthy human volunteers. *CHIMIA*. 2012;66(5):296–9.
209. Lusingu JP, Gesase S, Msham S, Francis F, Lemnge M, Seth M, et al. Satisfactory safety and immunogenicity of MSP3 malaria vaccine candidate in Tanzanian children aged 12–24 months. *Malar J*. 2009;8(1):163.
210. Ma Y, Lin B, Lin B, Hou S, Qian W, Li J, et al. Pharmacokinetics of CTLA4Ig fusion protein in

- healthy volunteers and patients with rheumatoid arthritis. *Acta Pharmacol Sin.* 2009;30(3):364–71.
211. Maccicchini M, Chang MY, Pan C, John V, Zetterberg H, Greig NH. Posiphen as a candidate drug to lower CSF amyloid precursor protein, amyloid- $\beta$  peptide and s levels: target engagement, tolerability and pharmacokinetics in humans. *J Neurol Neurosurg Psychiatry.* 2012;83:894–902.
212. Macfarlane D, Socrates A, Eisenberg P, Larcos G, Roach P, Gerometta M, et al. Imaging of deep venous thrombosis in patients using a radiolabelled anti-D-dimer Fab' fragment (99mTc-DI-DD3B6/22-80B3): results of a phase I trial. *Eur J Nucl Med Mol Imaging.* 2008;36(2):250–9.
213. Maddahi J, Czernin J, Lazewatsky J, Huang S-C, Dahlbom M, Schelbert H, et al. Phase I, first-in-human study of BMS747158, a novel 18f-labeled tracer for myocardial perfusion PET: dosimetry, biodistribution, safety, and imaging characteristics after a single injection at rest. *J Nucl Med.* 2011;52(9):1490–8.
214. Manvelian G, Daniels S, Ginofsky A. The pharmacokinetic parameters of a single dose of a novel nano-formulated, lower-dose oral diclofenac. *Postgrad Med.* 2012;124(1):117–23.
215. Mao ZL, Alak A, Wheeler JJ, Keirns J. Disposition and mass balance of [14c]vernakalant after single intravenous and oral doses in healthy volunteers. *Drug Metab Lett.* 2011;5:114–25.
216. Marshall HS, Richmond PC, Nissen MD, Jiang Q, Anderson AS, Jansen KU, et al. Safety and immunogenicity of a meningococcal b bivalent RLP2086 vaccine in healthy toddlers aged 18 to 36 months. *Pediatr Infect Dis J.* 2012; 31:1061-1068.
217. Martin P, Oliver S, Kennedy S-J, Partridge E, Hutchison M, Clarke D, et al. Pharmacokinetics of vandetanib: three phase i studies in healthy subjects. *Clin Ther.* 2012;34(1):221–37.
218. Martinsson-Niskanen T, Riisbro R, Larsson L, Winstedt L, Stenberg Y, Pakola S, et al. Monoclonal antibody TB-403: a first-in-human, phase i, double-blind, dose escalation study directed against placental growth factor in healthy male subjects. *Clin Ther.* 2011;33(9):1142–9.
219. Mason JW, Selness DS, Moon TE, O'Mahony B, Donachie P, Howell J. Pharmacokinetics and repolarization effects of intravenous and transdermal granisetron. *Clin Cancer Res.* 2012;18(10):2913–21.
220. McCarthy JS, Marjason J, Elliott S, Fahey P, Bang G, Malkin E, et al. A phase 1 trial of MSP2-C1, a blood-stage malaria vaccine containing 2 isoforms of MSP2 formulated with Montanide® ISA 720. *PLoS One.* 2011;6(9):e24413.
221. McGuire BM, Zupanets IA, Lowe ME, Xiao X, Sypliviy VA, Monteleone J, et al. Pharmacology and safety of glycerol phenylbutyrate in healthy adults and adults with cirrhosis. *Hepatology.* 2010;51(6):2077–85.
222. Meador KJ, Gevins A, Leese PT, Otoul C, Loring DW. Neurocognitive effects of brivaracetam, levetiracetam, and lorazepam. *Epilepsia.* 2010; 52:264-72.
223. Mehendale S, Sahay S, Thakar M, Sahasrabudhe S, Kakade M, Shete A, et al. Safety & immunogenicity of tgAAC09, a recombinant adeno-associated virus type 2 HIV-1 subtype C vaccine in India. *Indian J Med Res.* 2010;132:168–75.
224. Mendzelevski B, Ausma J, Chanter DO, Robinson P, Kerstens R, Vandeplassche L, et al. Assessment of the cardiac safety of prucalopride in healthy volunteers: a randomized, double-blind, placebo- and positive-controlled thorough QT study. *Br J Clin Pharmacol.* 2012;73(2):203–9.
225. Meng F-Y, Li J-X, Li X-L, Chu K, Zhang Y-T, Ji H, et al. Tolerability and immunogenicity of an inactivated enterovirus 71 vaccine in Chinese healthy adults and children: an open label, phase 1 clinical trial. *Hum Vaccin Immunother.* 2012;8(5):668–74.
226. Mesia K, Cimanga K, Tona L, Mampunza M, Ntamabyaliro N, Muanda T, et al. Assessment of the short-term safety and tolerability of a quantified 80 % ethanol extract from the stem bark of nauclea

- pobeguunii (PR 259 CT1) in healthy volunteers: a clinical phase I study. *Planta Med.* 2010;77(02):111–6.
227. Miller C, Miller M, McMullin B, Regev G, Serghides L, Kain K, et al. A phase I clinical study of inhaled nitric oxide in healthy adults. *J Cyst Fibros.* 2012;11(4):324–31.
228. Miller RS, Li Q, Cantilena LR, Leary KJ, Saviolakis GA, Melendez V, et al. Pharmacokinetic profiles of artesunate following multiple intravenous doses of 2, 4, and 8 mg/kg in healthy volunteers: Phase 1b study. *Malar J.* 2012;11(225):1–10.
229. Modi NB, Nath R, Staehr P, Gupta SK, Aquilina JW, Rivas D. Pharmacokinetics and pharmacodynamic, pharmacokinetic, pharmacodynamic, and electrocardiographic effects of dapoxetine and moxifloxacin compared with placebo in healthy adult male subjects. *J Clin Pharmacol.* 2009;49(6):634–42.
230. Morrison D, Legg TJ, Billings CW, Forrat R, Yoksan S, Lang J. A novel tetravalent dengue vaccine is well tolerated and immunogenic against all 4 serotypes in flavivirus-naïve adults. *J Infect Dis.* 2010;201(3):370–7.
231. Morrow L, Muchmore DB, Ludington EA, Vaughn DE, Hompesch M. Reduction in intrasubject variability in the pharmacokinetic response to insulin after subcutaneous co-administration with recombinant human hyaluronidase in healthy volunteers. *Diabetes Technol Ther.* 2011;13(10):1039–45.
232. Muto C, Dai H, Teeter JG, Johnson S, Cropp AB, Chiba K, et al. The pharmacokinetics and pharmacodynamics of PF-00734200, a DPP-IV inhibitor, in healthy Japanese subjects. *Int J Clin Pharmacol Ther.* 2012;50(7):505–9.
233. Myers S, O'Connor J, Fitton H, Brooks L, Rolfe M, Connellan, et al. A combined phase I and II open-label study on the immunomodulatory effects of seaweed extract nutrient complex. *Biologics.* 2011; 5:45-60.
234. Nagase S, Ohyama M, Hashimoto Y, Small M, Kuwayama T, Deacon S. Pharmacodynamic effects on biochemical markers of bone turnover and pharmacokinetics of the cathepsin K inhibitor, ONO-5334, in an ascending multiple-dose, phase 1 study. *J Clin Pharmacol.* 2012;52(3):306–18.
235. Nations KR, Bursi R, Dogterom P, Ereshefsky L, Gertsik L, Mant T, et al. Maximum tolerated dose evaluation of the AMPA modulator org 26576 in healthy volunteers and depressed patients a summary and method analysis of bridging research in support of phase ii dose selection. *Drugs R D.* 2012;12(3):127–39.
236. Nel AM, Smythe SC, Habibi S, Kaptur PE, Romano JW. Pharmacokinetics of 2 dapivirine vaginal microbicide gels and their safety vs. hydroxyethyl cellulose-based universal placebo gel. *J Acquir Immune Defic Syndr.* 2012;55(2):161–9.
237. Ng J, Chiu Y-L, Awni W, Bernstein B, Causemaker SJ, Klein CE. Pharmacokinetics and safety of the lopinavir/ritonavir tablet 500/125 mg twice daily coadministered with efavirenz in healthy adult participants. *J Clin Pharmacol.* 2012;52(8):1248–54.
238. Niazi M, Anderson T, Naucclér E, Næsdal J. Evaluation of bioequivalence between a single-capsule formulation of esomeprazole 40 mg and acetylsalicylic acid 325 mg and the monotherapies given separately in healthy volunteers. *Int J Clin Pharmacol Ther.* 2011;49(2):169–76.
239. Niazi M, Skrtic S, Ruth M, Holmberg AA. Pharmacokinetic profile of lesogaberan (AZD3355) in healthy subjects: a novel GABAB-receptor agonist reflux inhibitor. *Drugs R D.* 2011;11(1):77–83.
240. Nicholson KG, Thompson CI, Klapp JM, Wood JM, Batham S, Newman RW, et al. Safety and immunogenicity of whole-virus, alum-adjuvanted whole-virus, virosomal, and whole-virus intradermal influenza A/H9N2 vaccine formulations. *Vaccine.* 2009;28(1):171–8.
241. Nolan TM, Richmond PC, Skeljo MV, Pearce G, Hartel G, Formica NT, et al. Phase I and II

- randomised trials of the safety and immunogenicity of a prototype adjuvanted inactivated split-virus influenza A (H5N1) vaccine in healthy adults. *Vaccine*. 2008;26(33):4160–7.
242. Nunes T, Rocha JF, Vaz-Da-Silva M, Igreja B, Wright LC, Falcaõ A, et al. Safety, tolerability, and pharmacokinetics of etamicastat, a novel dopamine-b- hydroxylase inhibitor, in a rising multiple-dose study in young healthy subjects. *Drugs R D*. 2010;10(4):225–42.
243. O'Mara E, Kasserra C, Huddleston JR, Wan Y, Soni P, Caceres M, et al. Effect of vicriviroc on the QT/corrected QT interval and central nervous system in healthy subjects. *Antimicrob Agents Chemother*. 2010;54(6):2448–54.
244. Ortiz S, Flach S, Caracta C, Gil EG, Jansat JM. Safety and tolerability of acclidinium administered intravenously and absolute bioavailability of inhaled acclidinium in healthy male participants. *J Clin Pharmacol*. 2012;52(6):819–27.
245. Ortiz S, Flach S, Ho J, Li F, Caracta CF, Gil EG, et al. Mass balance and metabolism of acclidinium bromide following intravenous administration of [<sup>14</sup>C]-acclidinium bromide in healthy subjects. *Biopharm Drug Dispos*. 2012;33(1):39–45.
246. Othman AA, Lenz RA, Zhang J, Li J, Awni WM, Dutta S. Single- and multiple-dose pharmacokinetics, safety, and tolerability of the selective  $\alpha 7$  neuronal nicotinic receptor agonist, ABT-107, in healthy human volunteers. *J Clin Pharmacol*. 2011;51(4):512–26.
247. Othman AA, Nothhaft W, Awni WM, Dutta S. Pharmacokinetics of the TRPV1 antagonist ABT-102 in healthy human volunteers: population analysis of data from 3 phase 1 trials. *J Clin Pharmacol*. 2012;52(7):1028–41.
248. Padhi D, Harris RZ, Salfi M, Noveck RJ, Sullivan JT. Pharmacokinetics and pharmacodynamics of cinacalcet in hepatic impairment phase i, open-label, parallel-group, single-dose, single-centre study. *Clin Drug Invest*. 2008;28(10):635–43.
249. Pakola S, Cahillane G, Stassen J-M, Lijnen HR, Verhamme P. Neutralization of  $\alpha 2$ -antiplasmin by microplasmin: A randomized, double-blind, placebo-controlled, ascending-dose study in healthy male volunteers. *Clin Ther*. 2009;31(8):1688–706.
250. Pan S-C, Kung H-C, Kao T-M, Wu H, Dong S-X, Hu M-H, et al. The Madin-Darby canine kidney cell culture derived influenza A/H5N1 vaccine: a phase I trial in Taiwan. *J Microbial Immunol Infect*. Epub 2012. doi: 10.1016/j.jmii.2012.08.002
251. Patel H, Andresen A, Vente A, Heilmann H-D, Stubbings W, Seiberling M, et al. Human pharmacokinetics and safety profile of finafloxacin, a new fluoroquinolone antibiotic, in healthy volunteers. *Antimicrob Agents Chemother*. 2011;55(9):4386–93.
252. Patel SM, Atmar RL, El Sahly HM, Guo K, Hill H, Keitel WA. Direct comparison of an inactivated subvirion influenza a virus subtype h5n1 vaccine administered by the intradermal and intramuscular routes. *J Infect Dis*. 2012;206(7):1069–77.
253. Pathan AA, Minassian AM, Sander CR, Rowland R, Porter DW, Poulton ID, et al. Effect of vaccine dose on the safety and immunogenicity of a candidate TB vaccine, MVA85A, in BCG vaccinated UK adults. *Vaccine*. 2012;30(38):5616–24.
254. Pavez Loriè E, Cools M, Borgers M, Wouters L, Shroot B, Hagforsen E, et al. Topical treatment with CYP26 inhibitor talarozole (R115866) dose dependently alters the expression of retinoid-regulated genes in normal human epidermis. *Br J Dermatol*. 2009;160(1):26–36.
255. Peppe J, Porzio A, Davidson DM. A new formulation of tolevamer, a novel nonantibiotic polymer, is safe and well-tolerated in healthy volunteers: a randomized phase I trial. *Br J Clin Pharmacol*. 2008;66(1):102–9.

256. Perrine SP, Wargin WA, Boosalis MS, Wallis WJ, Case S, Keefer JR, et al. Evaluation of safety and pharmacokinetics of sodium 2,2 dimethylbutyrate, a novel short chain fatty acid derivative, in a phase I, double-blind, placebo-controlled, single-dose, and repeat-dose studies in healthy volunteers. *J Clin Pharmacol.* 2011;51(8):1186–94.
257. Petäjä T, Keränen H, Karppa T, Kawa A, Lantela S, Siitari-Mattila M, et al. Immunogenicity and safety of human papillomavirus (HPV)-16/18 AS04-adjuvanted vaccine in healthy boys aged 10–18 years. *J Adolesc Health.* 2009;44(1):33–40.
258. Peterschmitt MJ, Burke A, Blankstein L, Smith SE, Puga AC, Kramer WG, et al. Safety, tolerability, and pharmacokinetics of eliglustat tartrate (genz-112638) after single doses, multiple doses, and food in healthy volunteers. *J Clin Pharmacol.* 2011;51(5):695–705.
259. Petrides PE, Glisslinger H, Steurer M, Linkensech W, Krumple G, Schüller A, et al. Pharmacokinetics, bioequivalence, tolerability, and effects on platelet counts of two formulations of anagrelide in healthy volunteers and patients with thrombocythemia associated with chronic myeloproliferation. *Clin Ther.* 2009;31(2):387–98.
260. Pierce D, Hossack S, Robinson A, Zhang P, Martin P. Assessment of pharmacodynamic equivalence and tolerability of lanthanum carbonate oral powder and tablet formulations: a single-center, randomized, open-label, 2-period crossover study in healthy subjects. *Clin Ther.* 2012;34(6):1290–1300.
261. Ping F, Zhong-ping G, Lin-ling ZOU, Li Z, Nan X, Ying W, et al. Phase I clinical trial on tolerability of yinhuang injection. *Chin J Evid-based Med.* 2012;12(3):278–82.
262. Pithavala YK, Tortorici M, Toh M, Garrett M, Hee B, Kuruganti U, et al. Effect of rifampin on the pharmacokinetics of Axitinib (AG-013736) in Japanese and Caucasian healthy volunteers. *Cancer Chemother Pharmacol.* 2010;65(3):563–70.
263. Pithavala YK, Tong W, Mount J, Rahavendran SV, Garrett M, Hee B, et al. Effect of ketoconazole on the pharmacokinetics of axitinib in healthy volunteers. *Invest New Drugs.* 2012;30(1):273–81.
264. Pleguezuelos O, Robinson S, Stoloff GA, Caparrós-Wanderley W. Synthetic influenza vaccine (FLU-v) stimulates cell mediated immunity in a double-blind, randomised, placebo-controlled phase I trial. *Vaccine.* 2012;30(31):4655–60.
265. Poo J, Galan F, Forrat R, Zambrano B, Lang J, Dayan GH. Live-attenuated tetravalent dengue vaccine in dengue-naïve children, adolescents, and adults in Mexico City. *Pediatr Infect Dis J.* 2011;30(1):e9–e17.
266. Precioso AR, Miraglia JL, Campos LMA, Goulart AC, Timenetsky M do CST, Cardoso MRA, et al. A phase I randomized, double-blind, controlled trial of 2009 influenza A (H1N1) inactivated monovalent vaccines with different adjuvant systems. *Vaccine.* 2011;29(48):8974–81.
267. Priddy FH, Brown D, Kublin J, Monahan K, Wright DP, Lalezari J, et al. Safety and immunogenicity of a replication-incompetent adenovirus type 5 HIV-1 clade B gag/pol/nef vaccine in healthy adults. *Clin Infect Dis.* 2008;46(11):1769–81.
268. Qi L, Yong-qiao L, Hong-yan Z, Liang S, Ling-zhi L, Lan H, et al. A phase I study for evaluating the safety and tolerability of Zhishenjieyu capsule. *Chin J New Drugs.* 2009;18(9):819–22.
269. Ramanathan S, Kakuda TN, Mack R, West S, Kearney BP. Pharmacokinetics of elvitegravir and etravirine following coadministration of ritonavir-boosted elvitegravir and etravirine. *Antivir Ther.* 2008;13:1011–7.
270. Rasmussen MH, Bysted BV, Anderson TW, Klitgaard T, Madsen J. Pegylated long-acting human growth hormone is well-tolerated in healthy subjects and possesses a potential once-weekly pharmacokinetic and pharmacodynamic treatment profile. *J Clin Endocrinol Metab.* 2010;95(7):3411–7.

271. Ratner P, Wingertzahn MA, Herzog R, Huang H, Desai SY, Maier G, et al. An investigation of the pharmacokinetics, pharmacodynamics, safety, and tolerability of ciclesonide hydrofluoroalkane nasal aerosol in healthy subjects and subjects with perennial allergic rhinitis. *Pulm Pharmacol Ther*. 2011;24(4):426–33.
272. Richmond PC, Nissen MD, Marshall HS, Lambert SB, Robertson D, Gruber WC, et al. A bivalent *Neisseria meningitidis* recombinant lipidated factor H binding protein vaccine in young adults: results of a randomised, controlled, dose-escalation phase 1 trial. *Vaccine*. 2012;30(43):6163–74.
273. Rico S, Antonijoan RM, Gich I, Borrell M, Fontcuberta J, Monreal M, et al. Safety assessment and pharmacodynamics of a novel ultra low molecular weight heparin (RO-14) in healthy volunteers – a first-time-in-human single ascending dose study. *Thromb Res*. 2011;127(4):292–8.
274. Riddle MS, Kaminski RW, Williams C, Porter C, Baqar S, Kordis A, et al. Safety and immunogenicity of an intranasal *Shigella flexneri* 2a Invaplex 50 vaccine. *Vaccine*. 2011;29(40):7009–19.
275. Riddle V, Leese P, Blanset D, Adamcio M, Meldorf M, Lowy I. Phase I study evaluating the safety and pharmacokinetics of MDX-1303, a fully human monoclonal antibody against bacillus anthracis protective antigen, in healthy volunteers. *Clin Vaccine Immunol*. 2011;18(12):2136–42.
276. Riveau G, Deplanque D, Remoué F, Schacht A-M, Vodougnon H, Capron M, et al. Safety and immunogenicity of rSh28GST antigen in humans: phase 1 randomized clinical study of a vaccine candidate against urinary schistosomiasis. *PLoS Negl Trop Dis*. 2012;6(7):e1704.
277. Rocha JF, Vaz-Da-Silva M, Nunes T, Igreja B, Loureiro AI, Bonifácio MJ, et al. Single-dose tolerability, pharmacokinetics, and pharmacodynamics of etamicastat (BIA 5-453), a new dopamine  $\beta$ -hydroxylase inhibitor, in healthy subjects. *J Clin Pharmacol*. 2012;52(2):156–70.
278. Roestenberg M, Remarque E, de Jonge E, Hermsen R, Blythman H, Leroy O, et al. Safety and immunogenicity of a recombinant *Plasmodium falciparum* AMA1 malaria vaccine adjuvanted with alhydrogel<sup>™</sup>, montanide ISA 720 or AS02. *PLoS One*. 2008;3(12):e3960.
279. Rolan P, Gibbons JA, He L, Chang E, Jones D, Gross MI, et al. Ibuprofen in healthy volunteers: safety, tolerability and pharmacokinetics with single and multiple doses. *Br J Clin Pharmacol*. 2008;66(6):792–801.
280. Romano J, Variano B, Coplan P, Van Roey J, Douville K, Rosenberg Z, et al. Safety and availability of dapivirine (TMC120) delivered from an intravaginal ring. *AIDS Res Hum Retroviruses*. 2009;25(5):483–8.
281. Romanowski B, Schwarz TF, Ferguson LM, Peters K, Dionne M, Schulze K, et al. Immunogenicity and safety of the HPV-16/18 AS04-adjuvanted vaccine administered as a 2-dose schedule compared to the licensed 3-dose schedule: Results from a randomized study. *Hum Vaccin*. 2011;7(12):1374–86.
282. Rowbotham MC, Nothaft W, Duan WR, Wang Y, Faltynek C, McGaraughty S, et al. Oral and cutaneous thermosensory profile of selective TRPV1 inhibition by ABT-102 in a randomized healthy volunteer trial. *Pain*. 2011;152(5):1192–200.
283. Rynkiewicz D, Rathkopf M, Sim I, Waytes AT, Hopkins RJ, Giri L, et al. Marked enhancement of the immune response to BioThrax® (Anthrax Vaccine Adsorbed) by the TLR9 agonist CPG 7909 in healthy volunteers. *Vaccine*. 2011;29(37):6313–20.
284. Sampson JH, Archer GE, Mitchell DA, Heimberger AB, Herndon JE, Lally-Goss D, et al. An epidermal growth factor receptor variant III-targeted vaccine is safe and immunogenic in patients with glioblastoma multiforme. *Mol Cancer Ther*. 2009;8(10):2773–9.

285. Sandström E, Nilsson C, Hejdeman B, Bråve A, Bratt G, Robb M, et al. Broad immunogenicity of a multigene, multiclade HIV-1 DNA vaccine boosted with heterologous HIV-1 recombinant modified vaccinia virus ankara. *J Infect Dis*. 2008;198(10):1482–90.
286. Schaller G, Dittrich P, Felizeter M, Gouya G, Leuchten N, Kapiotis S, et al. Human pharmacokinetics of intravenous recombinant human Cu/Zn superoxide dismutase. *Int J Clin Pharmacol Ther*. 2012;50(6):413–7.
287. Schelfhout VJ, Ferrer P, Jansat JM, Peris F, Gil EG, Pauwels RA, et al. Activity of acridinium bromide, a new long-acting muscarinic antagonist: a phase I study. *Br J Clin Pharmacol*. 2010;69(5):458–64.
288. Schiff M, Hochberg MC, Oldenhof J, Brune K. Platelet inhibitory effects of OTC doses of naproxen sodium compared with prescription dose naproxen sodium and low-dose aspirin. *Curr Med Res Opin*. 2009;25(10):2471–7.
289. Schmiedl S, Szymanski J, Wartenberg-Demand A, Remy A, Thürmann P. Evaluation of pharmacokinetics and safety of the igm enriched immunoglobulin concentrate bt086 in healthy volunteers – results of a dose-escalating single dose phase I study. *Br J Clin Pharmacol*. 2011; 72(S1): 21.
290. Schranz J, Clark J, Marion A, Ghibellini G, Fernandes P. A phase I trial to evaluate the safety and pharmacokinetics of single doses of intravenous solithromycin (CEM-101) in healthy adult subjects. *European Congress of Clinical Microbiology and Infectious Diseases*; 2011 May 7-10; Milan, Italy. 2011. p. S19-S20.
291. Schwartz JL, Ballagh SA, Creinin MD, Rountree RW, Kilbourne-Brook M, Mauck CK, et al. SILCS diaphragm: postcoital testing of a new single-size contraceptive device. *Contraception*. 2008;78(3):237–44.
292. Sedegah M, Tamminga C, McGrath S, House B, Ganeshan H, Lejano J, et al. Adenovirus 5-Vectored P. falciparum Vaccine Expressing CSP and AMA1. Part A: Safety and Immunogenicity in Seronegative Adults. *PLoS One*. 2011;6(10):e24586.
293. Semba CP, Swearingen D, Smith VL, Newman MS, O'Neill CA, Burnier JP, et al. Safety and pharmacokinetics of a novel lymphocyte function-associated antigen-1 antagonist ophthalmic solution (SAR 1118) in healthy adults. *J Ocul Pharmacol Ther*. 2011;27(1):99–104.
294. Sha S, Devineni D, Ghosh A, Polidori D, Chien S, Wexler D, et al. Canagliflozin, a novel inhibitor of sodium glucose co-transporter 2, dose dependently reduces calculated renal threshold for glucose excretion and increases urinary glucose excretion in healthy subjects. *Diabetes Obes Metab*. 2011;13(7):669–72.
295. Shailubhai K, Gerson WA, Talluto C, Jacob GS. SP-304 to treat GI disorders - effects of a single, oral-dose of SP-304 on safety, tolerability, pharmacokinetics and pharmacodynamics in healthy volunteers. *Gastroenterology*; 2009; 5(S1): A641.
296. Shaw JP, Cheong J, Goldberg MR, Kitt MM. Mass balance and pharmacokinetics of [14c]telavancin following intravenous administration to healthy male volunteers. *Antimicrob Agents Chemother*. 2010;54(8):3365–71.
297. Shechter M, Saad T, Shechter A, Koren-Morag N, Silver BB, Matetzky S. Comparison of magnesium status using X-ray dispersion analysis following magnesium oxide and magnesium citrate treatment of healthy subjects. *Magnes Res*. 2012;25(1):28–39.
298. Sheehy SH, Duncan CJ, Elias SC, Collins KA, Ewer KJ, Spencer AJ, et al. Phase Ia clinical evaluation of the plasmodium falciparum blood-stage antigen MSP1 in ChAd63 and MVA Vaccine Vectors. *Mol Ther*. 2011;19(12):2269–76.

299. Sheehy SH, Duncan CJA, Elias SC, Biswas S, Collins KA, O'Hara GA, et al. Phase Ia Clinical Evaluation of the safety and immunogenicity of the plasmodium falciparum blood-stage antigen AMA1 in ChAd63 and MVA vaccine vectors. *PLoS One*. 2012;7(2):e31208.
300. Sheldon E, Schwartz H, Jiang Q, Giardina PC, Perez JL. A Phase 1, randomized, open-label, active-controlled trial to assess the safety of a meningococcal serogroup B bivalent rLP2086 vaccine in healthy adults. *Hum Vaccin Immunother*. 2012;8(7):7–14.
301. Shenouda M, Maldonado M, Wang Y, Bouillaud E, Hudson M, Nesheiwat D, et al. An open-label dose-escalation study of once-daily and twice-daily pasireotide in healthy volunteers: safety, tolerability, and effects on glucose, insulin, and glucagon levels. *Am J Ther*. 2012;0(0):1–10.
302. Shiga T, Tanaka T, Irie S, Hagiwara N, Kasanuki H. Pharmacokinetics of intravenous amiodarone and its electrocardiographic effects on healthy Japanese subjects. *Heart Vessels*. 2010;26(3):274–81.
303. Shue YK, Sears PS, Shangle S, Walsh RB, Lee C, Gorbach SL, et al. Safety, tolerance, and pharmacokinetic studies of OPT-80 in healthy volunteers following single and multiple oral doses. *Antimicrob Agents Chemother*. 2008;52(4):1391–5.
304. Siegel M, Garber ME, Spencer AG, Botwick W, Kumar P, Williams RN, et al. Safety, tolerability, and activity of ALV003: results from two phase 1 single, escalating-dose clinical trials. *Dig Dis Sci*. 2011;57(2):440–50.
305. Simasathien S, Thomas SJ, Watanaveeradej V, Nisalak A, Barberousse C, Innis BL, et al. Safety and immunogenicity of a tetravalent live-attenuated dengue vaccine in flavivirus naive children. *Am J Trop Med Hyg*. 2008;78(3):426–33.
306. Sirima SB, Tiono AB, Ouédraogo A, Diarra A, Ouédraogo AL, Yaro JB, et al. Safety and immunogenicity of the malaria vaccine candidate MSP3 long synthetic peptide in 12–24 months-old Burkinabe children. *PLoS One*. 2009;4(10):e7549.
307. Skolnick BE, Shenouda M, Khutoryansky NM, Pusateri AE, Gabriel D, Carr ME. Reversal of clopidogrel-induced bleeding with rFViiia in healthy subjects. *Anesth Analg*. 2011; 113(4): 703-10.
308. Smith LR, Wloch MK, Ye M, Reyes LR, Boutsaboualoy S, Dunne CE, et al. Phase 1 clinical trials of the safety and immunogenicity of adjuvanted plasmid DNA vaccines encoding influenza A virus H5 hemagglutinin. *Vaccine*. 2010;28(13):2565–72.
309. Smith W, Swan S, Marbury T, Henney H. Single-dose pharmacokinetics of sustained-release fampridine (fampridine-sr) in healthy volunteers and adults with renal impairment. *J Clin Pharmacol*. 2010;50(2):151–9.
310. Song-ze W, Jia M, Zhu L, Ying W. Tolerance of medical charcoal enteric-coated tablets in a phase I study. *Chin J Evid-based Med*. 2009;9(2):204–6.
311. Spearman P, Lally MA, Elizaga M, Montefiori D, Tomaras GD, McElrath MJ, et al. A trimeric, v2-deleted HIV-1 envelope glycoprotein vaccine elicits potent neutralizing antibodies but limited breadth of neutralization in human volunteers. *J Infect Dis*. 2011;203(8):1165–73.
312. Spearman P, Kalams S, Elizaga M, Metch B, Chiu Y-L, Allen M, et al. Safety and immunogenicity of a CTL multi-epitope peptide vaccine for HIV with or without GM-CSF in a phase I trial. *Vaccine*. 2009;27(2):243–9.
313. Sriwiriyan S, Samaeng M, Ridditid W, Mahatthanatrakul W, Wongnawa M. Pharmacokinetic interactions between ciprofloxacin and itraconazole in healthy male volunteers. *Biopharm Drug Dis*. 2011;32(3):168–74.
314. Stanberry LR, Simon JK, Johnson C, Robinson PL, Morry J, Flack MR, et al. Safety and immunogenicity of a novel nanoemulsion mucosal adjuvant W805EC combined with approved seasonal



influenza antigens. *Vaccine*. 2012;30(2):307–16.

315. Stefano AFD, Rusca A. Pressor response to oral tyramine during co-administration with safinamide in healthy volunteers. *N-S Arch Pharmacol*. 2011;384(6):505–15.
316. Stein EA, Mellis S, Yancopoulos GD, Stahl N, Logan D, Smith WB, et al. Effect of a monoclonal antibody to PCSK9 on LDL cholesterol. *N Engl J Med*. 2012;366(12):1108–18.
317. Steiner I, Errhalt P, Kubesch K, Hubner M, Holy M, Bauer M, et al. Pulmonary pharmacokinetics and safety of nebulized duramycin in healthy male volunteers. *N-S Arch Pharmacol*. 2008;378(3):323–33.
318. Steudel W, Dingmann C, Zhang Y-L, Bendrick-Pearl J, Clavijo C, Shulze J, et al. Randomized, double-blind, placebo-controlled, single intravenous dose-escalation study to evaluate the safety, tolerability, and pharmacokinetics of the novel coronary smooth muscle cell proliferation inhibitor biolimus A9 in healthy individuals. *J Clin Pharmacol*. 2011;51(1):29–39.
319. Stickney DR, Ahlem CN, Morgan E, Reading CL, Onizuka N, Frincke JM. Phase I and Phase II clinical trials of androst-5-ene-3 $\beta$ ,7 $\beta$ ,17 $\beta$ -triol. *Am J Transl Re*. 2011;3(3):275–83.
320. Still JG, Clark K, Degenhardt TP, Scott D, Fernandes P, Gutierrez MJ. Pharmacokinetics and safety of single, multiple, and loading doses of fusidic acid in healthy subjects. *Clin Infect Dis*. 2011;52(S7):S504–S512.
321. Stopfer P, Rathgen K, Bischoff D, Lütke S, Marzin K, Kaiser R, et al. Pharmacokinetics and metabolism of BIBF 1120 after oral dosing to healthy male volunteers. *Xenobiotica*. 2011;41(4):297–311.
322. Sturm S, Seiberling M, Weick I, Paehler A, Funk C, Ruf T. Metabolism, excretion, and pharmacokinetics of [14c]-radiolabeled aleglitazar: a phase I, nonrandomized, open-label, single-center, single-dose study in healthy male volunteers. *Clin Ther*. 2012;34(2):420–9.
323. Sun P, Zhao X, Zhou Y, Liang Y, Zhang H, Cui Y, et al. Tolerance and pharmacokinetics of single-dose intravenous hemoporphin in healthy volunteers. *Acta Pharmacol Sin*. 2011;32(12):1549–54.
324. Swergold G, Biedermann S, Renard R, Du Y, Nadler D, Wu R, et al. REGN727/SAR236553, a fully-human monoclonal antibody to proprotein convertase subtilisin kexin 9(PCSK9), decreases ApoB and non-HDL-C when administered intravenously to healthy volunteers. *J Clin Lipidol*. 2011;5(3):219.
325. Talaat KR, Karron RA, Liang PH, McMahon BA, Luke CJ, Thumar B, et al. An open-label phase I trial of a live attenuated H2N2 influenza virus vaccine in healthy adults. *Influenza Other Respi Viruses*. Epub 2012;7(1):66–73.
326. Tambyah PA, Wilder-Smith A, Pavlova BG, Barrett PN, Oh HML, Hui DS, et al. Safety and immunogenicity of two different doses of a Vero cell-derived, whole virus clade 2 H5N1 (A/Indonesia/05/2005) influenza vaccine. *Vaccine*. 2012;30(2):329–35.
327. Tan TM, Field BCT, Minnion JS, Cuenco-Shillito J, Chambers ES, Zac-Varghese S, et al. Pharmacokinetics, adverse effects and tolerability of a novel analogue of human pancreatic polypeptide, PP 1420. *Br J Clin Pharmacol*. 2012;73(2):232–9.
328. Tanihara H, Inatani M, Honjo M, Tokushige H, Azuma J, Araie M. Intraocular pressure-lowering effects and safety of topical administration of a selective ROCK inhibitor, SNJ-1656, in healthy volunteers. *Arch Ophthalmol*. 2008;126(3):309–15.
329. Tanii H, Shitara Y, Horie T. Population pharmacokinetic analysis of letrozole in Japanese postmenopausal women. *Eur J Clin Pharmacol*. 2011;67(10):1017–25.
330. Teichman SL, Tuvia S, Atsmon J, Katz S, Salama P, Pelled D, et al. Octreolin<sup>TM</sup> pharmacodynamics: an oral octreotide formulation to treat acromegaly suppresses growth hormone in healthy volunteers. *Endocr Rev*. 2012;33:OR49–4.
331. Teng R, Mitchell P, Butler K. Effect of age and gender on pharmacokinetics and

- pharmacodynamics of a single ticagrelor dose in healthy individuals. *Eur J Clin Pharmacol*. 2012;68(8):1175–82.
332. Tomaka F, Lefebvre E, Sekar V, Van Baelen B, Vangeneugden T, Vandevoorde A, et al. Effects of ritonavir-boosted darunavir vs ritonavir-boosted atazanavir on lipid and glucose parameters in HIV-negative, healthy volunteers. *HIV Med*. 2009;10(5):318–27.
333. Toneatto D, Ismaili S, Ypma E, Vienken K, Oster P, Dull P. The first use of an investigational multicomponent meningococcal serogroup B vaccine (4CMenB) in humans. *Hum Vaccin*. 2011;7(6):646–53.
334. Tribble D, Kaminski R, Cantrell J, Nelson M, Porter C, Baqar S, et al. Safety and immunogenicity of a *Shigella flexneri* 2a Invaplex 50 intranasal vaccine in adult volunteers. *Vaccine*. 2010;28(37):6076–85.
335. Troconiz IF, Cendros J-M, Peraire C, Ramis J, Garrido MJ, Boscani PF, et al. Population pharmacokinetic analysis of lanreotide autogel® in healthy subjects evidence for injection interval of up to 2 months. *Clin Pharmacokinet*. 2009;48(1):51–62.
336. Tuettenberg J, Seiz M, Debatin K-M, Hollburg W, von Staden M, Thiemann M, et al. Pharmacokinetics, pharmacodynamics, safety and tolerability of APG101, a CD95-Fc fusion protein, in healthy volunteers and two glioma patients. *Int Immunopharmacol*. 2012;13(1):93–100.
337. Turley CB, Rupp RE, Johnson C, Taylor DN, Wolfson J, Tussey L, et al. Safety and immunogenicity of a recombinant M2e-flagellin influenza vaccine (STF2.4xM2e) in healthy adults. *Vaccine*. 2011;29(32):5145–52.
338. Tzeng T-B, Chang W-K, Huang T-Y, Wu P-T, Huang W-C, Lee C, et al. Safety and tolerability of phycion in healthy volunteers in a phase I dose escalating clinical pharmacology study. *Gastroenterology*. 2011;140(5):S572.
339. Ungerer M, Rosport K, Bültmann A, Piechatzek R, Uhland K, Schlieper P, et al. Novel antiplatelet drug revacept (Dimeric Glycoprotein VI-Fc) specifically and efficiently inhibited collagen-induced platelet aggregation without affecting general hemostasis in humans. *Circulation*. 2011;123(17):1891–9.
340. Uusitalo H, Kaarniranta K, Ropo A. Pharmacokinetics, efficacy and safety profiles of preserved and preservative-free tafluprost in healthy volunteers. *Acta Ophthalmol*. 2008;86:7–13.
341. Van Braeckel E, Bourguignon P, Koutsoukos M, Clement F, Janssens M, Carletti I, et al. An adjuvanted polyprotein HIV-1 vaccine induces polyfunctional cross-reactive CD4+ T cell responses in seronegative volunteers. *Clin Infect Dis*. 2011 Jan 5;52(4):522–31.
342. Van Damme P, Kafeja F, Anemona A, Basile V, Hilbert AK, De Coster I, et al. Safety, immunogenicity and dose ranging of a new Vi-CRM $\alpha$  conjugate vaccine against typhoid fever: randomized clinical testing in healthy adults. *PLoS ONE*. 2011;6(9): e25398.
343. Van Lersel T, Stroissnig H, Giesen P, Wemer J, Wilhelm-Ogunbiyi K. Phase I study of Solulin, a novel recombinant soluble human thrombomodulin analogue. *Thromb Haemost*. 2011;105(2):302–12.
344. Varunok P, Lawitz E, Beavers KL, Matusow G, Leong R, Lambert N, et al. Evaluation of pharmacokinetics, user handling, and tolerability of peginterferon alfa-2a (40 kDa) delivered via a disposable autoinjector device. *Patient Prefer Adherence*. 2011;5:587–99.
345. Vasan S, Schlesinger SJ, Huang Y, Hurley A, Lombardo A, Chen Z, et al. Phase 1 Safety and Immunogenicity Evaluation of ADVAX, a Multigenic, DNA-Based Clade C/B' HIV-1 Candidate Vaccine. *PLoS One*. 2010;5(1):e8617.
346. Vasan S, Hurley A, Schlesinger SJ, Hannaman D, Gardiner DF, Dugin DP, et al. In vivo electroporation enhances the immunogenicity of an HIV-1 DNA vaccine candidate in healthy volunteers.

PLoS ONE. 2011;6(5):e19252.

347. Vasisht N, Gever LN, Tagarro I, Finn AL. Evaluation of the single- and multiple-dose pharmacokinetics of fentanyl buccal soluble film in normal healthy volunteers. *J Clin Pharmacol*. 2010;50(7):785–91.
348. Vaughan D, Speed J, Medve R, Andrews JS. Safety and pharmacokinetics of NXN-188 after single and multiple doses in five phase I, randomized, double-blind, parallel studies in healthy adult volunteers. *Clin Ther*. 2010;32(1):146–60.
349. Vaughn DE, Yocum RC, Muchmore DB, Sugarman BJ, Vick AM, Bilinsky IP, et al. Accelerated pharmacokinetics and glucodynamics of prandial insulins injected with recombinant human hyaluronidase. *Diabetes Technol Ther*. 2009;11(6):345–52.
350. Vavalle JP, Rusconi CP, Zelenkofske S, Wargin WA, Alexander JH, Becker RC. A phase 1 ascending dose study of a subcutaneously administered factor IXa inhibitor and its active control agent. *J Thromb Haemost*. 2012;10(7):1303–11.
351. Von Eschen K, Morrison R, Braun M, Ofori-Anyinam O, De Kock E, Pavithran P, et al. The candidate tuberculosis vaccine Mtb72F/AS02A. *Hum Vaccin*. 2009;5(7):475–82.
352. Vourvahis M, Davis J, Wang R, Layton G, Choo HW, Chong C-L, et al. Effect of rifampin and rifabutin on the pharmacokinetics of lersivirine and effect of lersivirine on the pharmacokinetics of rifabutin and 25-o-desacetyl-rifabutin in healthy subjects. *Antimicrob Agents Chemother*. 2012;56(8):4303–9.
353. Vourvahis M, Langdon G, Layton G, Labadie RR, Choo HW, Ndongo M-N, et al. The pharmacokinetics of lersivirine (UK-453,061) and HIV-1 protease inhibitor coadministration in healthy subjects. *J Acquir Immune Defic Syndr*. 2012;60(1):24–32.
354. Wade A, Pawsey S, Whale H, Boyce M, Warrington S. Pharmacokinetics of two 6-day frovatriptan dosing regimens used for the short-term prevention of menstrual migraine. *Clin Drug Invest*. 2009;29(5):325–37.
355. Wagenlehner FME, Wagenlehner CM, Blenk B, Blenk H, Schubert S, Dalhoff A, et al. Urinary pharmacokinetics and bactericidal activity of finafloxacin (200 and 800 mg) in healthy volunteers receiving a single oral dose. *Chemotherapy*. 2011;57(2):97–107.
356. Wagner CC, Rusca A, Kletter K, Tschurlovits M, Pace S, Longo A, et al. Plasma pharmacokinetics and gastrointestinal transit of a new Propionyl-L-Carnitine controlled release formulation. *Xenobiotica*. 2011;41(11):988–95.
357. Wagner M, Wagner S, Schnorr J, Schellenberger E, Kivelitz D, Krug L, et al. Coronary MR angiography using citrate-coated very small superparamagnetic iron oxide particles as blood-pool contrast agent: Initial experience in humans. *J Magn Reson Imaging*. 2011;34(4):816–23.
358. Walker G, Mandagere A, Dufton C, Venitz J. The pharmacokinetics and pharmacodynamics of warfarin in combination with ambrisentan in healthy volunteers. *Br J Clin Pharmacol*. 2009;67(5):527–34.
359. Waller CF, Bronchud MH, Mair SJ, Challand R. Bioequivalence of a biosimilar filgrastim and reference filgrastim: impact on the mobilization of CD34+ peripheral blood progenitor cells in a randomized, phase I study. 36<sup>th</sup> Annual Meeting of the European Group for Blood and Marrow Transplantation; 2010 Mar 21-24; Vienna, Austria. 2010.
360. Wallis RS, Jakubiec WM, Kumar V, Silvia AM, Paige D, Dimitrova D, et al. Pharmacokinetics and whole blood bactericidal activity against mycobacterium tuberculosis of single doses of PNU 100480 in healthy volunteers. *J Infect Dis*. 2010;202(5):745–51.

361. Walzer M, Bekersky I, Blum RA, Tolbert D. Pharmacokinetic drug interactions between clobazam and drugs metabolized by cytochrome P450 isoenzymes. *Pharmacotherapy*. 2012;32(4):340–53.
362. Wang H, Hu P, Jiang J. Pharmacokinetics and safety of calcium L-threonate in healthy volunteers after single and multiple oral administrations. *Act Pharmacol Sin*. 2011;32:1555–60.
363. Wason S, DiGiacinto JL, Davis MW. Effects of grapefruit and Seville orange juices on the pharmacokinetic properties of colchicine in healthy subjects. *Clin Ther*. 2012;34(10):2161–73.
364. Watanaveeradej V, Simasathien S, Nisalak A, Endy TP, Jarman RG, Innis BL, et al. Safety and immunogenicity of a tetravalent live-attenuated dengue vaccine in flavivirus-naive infants. *Am J Trop Med Hyg*. 2011;85(2):341–51.
365. Wecker M, Gilbert P, Russell N, Hural J, Allen M, Pensiero M, et al. Phase I safety and immunogenicity evaluations of an alphavirus replicon HIV-1 subtype C gag vaccine in healthy HIV-1-uninfected adults. *Clin Vaccine Immunol*. 2012;19(10):1651–60.
366. Weisman LE, Fischer GW, Thackray HM, Johnson KE, Schuman RF, Mandy GT, et al. Safety and pharmacokinetics of a chimerized anti-lipoteichoic acid monoclonal antibody in healthy adults. *Int Immunopharmacol*. 2009;9(5):639–44.
367. Whelan KT, Pathan AA, Sander CR, Fletcher HA, Poulton I, Alder NC, et al. Safety and immunogenicity of boosting bcg vaccinated subjects with bcg: comparison with boosting with a new tb vaccine, MVA85A. *PLoS One*. 2009;4(6):e5934.
368. Wire MB, McLean HB, Pendry C, Theodore D, Park JW, Peng B. Assessment of the pharmacokinetic interaction between eltrombopag and lopinavir-ritonavir in healthy adult subjects. *Antimicrob Agents Chemother*. 2012;56(6):2846–51.
369. Wloch MK, Smith LR, Boutsaboualoy S, Reyes L, Han C, Kehler J, et al. Safety and immunogenicity of a bivalent cytomegalovirus DNA vaccine in healthy adult subjects. *J Infect Dis*. 2008;197(12):1634–42.
370. Wood R, Stablein D, Henning A, Lindbalb R, Sicherer S. A phase 1 study of heat/phenol killed, e. coli-encapsulated, recombinant modified peanut proteins ara h 1, ara h 2, and ara h 3 (EMP-123) for the treatment of peanut allergy. *J Allergy Clin Immunol*. 2012;129(2S):AB27.
371. Wright PF, Ankrah S, Henderson SE, Durbin AP, Speicher J, Whitehead SS, et al. Evaluation of the langat/dengue 4 chimeric virus as a live attenuated tick-borne encephalitis vaccine for safety and immunogenicity in healthy adult volunteers. *Vaccine*. 2008;26(7):882–90.
372. Wu J, Liu S-Z, Dong S-S, Dong X-P, Zhang W-L, Lu M, et al. Safety and immunogenicity of adjuvanted inactivated split-virion and whole-virion influenza A (H5N1) vaccines in children: A phase I–II randomized trial. *Vaccine*. 2010;28(38):6221–7.
373. Wynne C, Harvey V, Schwabe C, Waaka D, McIntyre C, Bittner B. Comparison of Subcutaneous and Intravenous Administration of Trastuzumab: A Phase I/Ib Trial in Healthy Male Volunteers and Patients With HER2-Positive Breast Cancer. *J Clin Pharmacol*. Epub 2012. doi: 10.1177/0091270012436560
374. Xi-wei Z, Guo-Xin L, Chun-ling L, Ping W, Xiao L. Phase I clinical trial for tolerance of Zhongxiang capsule in healthy volunteers. *Chin J New Drugs*. 2009;18(5):424–6.
375. Xia Z, Pei-hong S, Ying Z, YU-wang L, Kai C-, Dong-fang Z, et al. Phase I human tolerability trial of aildenafil citrate tablet. *Chin J New Drugs*. 2008;17(17):1535–8.
376. Xian-gang W, Nan X, Cai W, Ying W, Juan C, Li Z. Phase I clinical tolerance study of cefuroxime/sulbactam. *Chin J Antibiotics*. 2009: 699–702.
377. Xu R, Yang XY, Yang DF, Zou CY, Gong PL, Zeng FD. Phase I evaluation of the safety and

pharmacokinetics of a single-dose intravenous injection of a murine monoclonal antibody against hantaan virus in healthy volunteers. *Antimicrob Agents Chemother.* 2009;53(12):5055–9.

378. Yamakage M, Bepperling F, Wargenau M, Miyao H. Pharmacokinetics and safety of 6 % hydroxyethyl starch 130/0.4 in healthy male volunteers of Japanese ethnicity after single infusion of 500 ml solution. *J Anesth.* 2012;26(6):851–7.

379. Yan S, Hau-qing W, Zhao Y, Zheng S, Hui-lai Z, Xiang-ming L, et al. A phase I trial for evaluating the tolerance of disodium panaxatriol 3,6-succinate. *Chin J New Drugs.* 2008;17(3):241–3.

380. Yi S, Chung Y-J, Kim T-E, Shin H-S, Yoon SH, Cho J-Y, et al. Pharmacokinetics of extended-release versus conventional tramadol/acetaminophen fixed-dose combination tablets: an open-label, 2-treatment, multiple-dose, randomized-sequence crossover study in healthy korean male volunteers. *Clin Ther.* 2011;33(6):728–37.

381. Zafar MU, Ibanez B, Choi BG, Vorchheimer DA, Piñero A, Jin X, et al. A new oral antiplatelet agent with potent antithrombotic properties: Comparison of DZ-697b with clopidogrel in a randomised phase I study. *Thromb Haemost.* 2009;103(1):205–12.

382. Zahir H, Matsushima N, Halim A-B, He L, Zhang G, Lee F, et al. Edoxaban administration following enoxaparin: A pharmacodynamic, pharmacokinetic, and tolerability assessment in human subjects. *Thromb Haemost.* 2012;108(1):166–75.

383. Ze-pu R, Ling-zhi L, Lan H, Wen-bin M, Wei-feng M, Rui Z, et al. A phase I trial for the tolerability of Aoshan injection. *Chin J New Drugs.* 2009;18(8):714–7.

384. Zeng X, Feng Y, Yang L, Huang Y, Zhou D, Sun J, et al. Single- and multiple-dose pharmacokinetics of genistein capsules in healthy chinese subjects: a phase i, randomized, open-label study. *Excerpta Med.* 2008;69(4):318–33.

385. Zeng X, Deng Y, Feng Y, Liu Y, Yang L, Huang Y, et al. Pharmacokinetics and safety of ginsenoside rd following a single or multiple intravenous dose in healthy chinese volunteers. *J Clin Pharmacol.* 2010;50(3):285–92.

386. Zhao L, Yang X, Xu R, Wu J, Gu S, Zhang L, et al. Safety, tolerability and pharmacokinetics of phenoprolamine hydrochloride floating sustained-release tablets in healthy Chinese subjects. *Int J Pharm.* 2009;377(1-2):99–104.

387. Zhao X, Sun P, Zhou Y, Liu Y, Zhang H, Mueck W, et al. Safety, pharmacokinetics and pharmacodynamics of single/multiple doses of the oral, direct Factor Xa inhibitor rivaroxaban in healthy Chinese subjects. *Br J Clin Pharmacol.* 2009;68(1):77–88.

388. Zhang W, Ayan-Oshodi M, Willis BA, Annes W, Hall D, Chiesa J, et al. QT effect of semagacestat at therapeutic and suprathreshold doses. *Int J Clin Pharmacol Ther.* 2012;50(4):290–9.

389. Zheng L, Nan X, Wang C, Wang Y, Luo Z, Luo H. Tolerability of hypodermic injection of pegfilgrastin (PEG-G-CSF) in a phase I study. *Chin J Evid-based Med.* 2008:155–8.

390. Zheng L, Yu Q, Miao J, Xiang J, Xu N. Bioequivalence study of two mirtazapine oral tablet formulations in healthy Chinese male volunteers. *Int J Clin Pharmacol Ther.* 2012;50(5):368–74.

391. Zheng S, Hua-qing W, Zhao Y, Xian-ming L, Hui-lai Z, Wei L, et al. A phase I trial for evaluating the tolerance of tyrosinase. *Chin J New Drugs.* 2008;17(3):237–40.

392. Zhong-ping G, Ping F, Zhu L, Lin-ling ZOU. Phase I clinical trial for tolerance of Weikang tablet. *Chinese Journal of New Drugs.* 2011;20(1):41–6.

393. Zollinger WD, Babcock JG, Moran EE, Brandt BL, Matyas GR, Wassef NM, et al. Phase I study of a *Neisseria meningitidis* liposomal vaccine containing purified outer membrane proteins and detoxified lipooligosaccharide. *Vaccine.* 2012;30(4):712–21.

## Risks of Phase I Research with Healthy Participants: A Systematic Review

|                                                                  |                                                                                                                                                                                                                                                                                                                                                                                                                                                                                                                                                                                                                                                                                                                                                                                                                                                                                                                                                                                                                                                                                                                                                                                                                                                                                                                                                                                   |  |
|------------------------------------------------------------------|-----------------------------------------------------------------------------------------------------------------------------------------------------------------------------------------------------------------------------------------------------------------------------------------------------------------------------------------------------------------------------------------------------------------------------------------------------------------------------------------------------------------------------------------------------------------------------------------------------------------------------------------------------------------------------------------------------------------------------------------------------------------------------------------------------------------------------------------------------------------------------------------------------------------------------------------------------------------------------------------------------------------------------------------------------------------------------------------------------------------------------------------------------------------------------------------------------------------------------------------------------------------------------------------------------------------------------------------------------------------------------------|--|
| Manuscript ID:                                                   | CT-15-0062.R1                                                                                                                                                                                                                                                                                                                                                                                                                                                                                                                                                                                                                                                                                                                                                                                                                                                                                                                                                                                                                                                                                                                                                                                                                                                                                                                                                                     |  |
| Funding Information:                                             | <b>U.S. Department of Health and Human Services</b> ✕                                                                                                                                                                                                                                                                                                                                                                                                                                                                                                                                                                                                                                                                                                                                                                                                                                                                                                                                                                                                                                                                                                                                                                                                                                                                                                                             |  |
| Submitting Author:                                               | <input type="text" value="Johnson, Rebecca"/> <input checked="" type="checkbox"/> Save  <u>Johnson, Rebecca</u> (proxy)                                                                                                                                                                                                                                                                                                                                                                                                                                                                                                                                                                                                                                                                                                                                                                                                                                                                                                                                                                                                                                                                                                                                                                         |  |
| Authors & Institutions:                                          | <hr/> <ul style="list-style-type: none"> <li>  <u>Johnson, Rebecca</u> proxy <ul style="list-style-type: none"> <li>• <i>primary affiliation</i><br/>Princeton University - Department of Sociology<br/>117 Wallace Hall Princeton New Jersey 08540<br/>United States</li> </ul> </li> <li>  <u>Rid, Annette</u> proxy <ul style="list-style-type: none"> <li>• Princeton University - Department of Sociology<br/>117 Wallace Hall , Princeton, New Jersey 08540<br/>United States</li> </ul> </li> <li>  <u>Emanuel, Ezekiel</u> proxy <ul style="list-style-type: none"> <li>• King's College London - Department of Social Science, Health, and Medicine<br/>London<br/>United Kingdom</li> </ul> </li> <li>  <u>Wendler, David</u> proxy <ul style="list-style-type: none"> <li>• University of Pennsylvania - Department of Medical Ethics and Health Policy<br/>Philadelphia<br/>United States</li> <li>• National Institutes of Health - Department of Bioethics<br/>Bethesda, Maryland<br/>United States</li> </ul> </li> </ul> |  |
| Contact Author (populates the ##PROLE_AUTHOR_..# # e-mail tags): | <input type="text" value="Johnson, Rebecca"/> <input checked="" type="checkbox"/> Save <span style="float: right;">Current Contact Author:<br/>Johnson, Rebecca<br/>(proxy)</span>                                                                                                                                                                                                                                                                                                                                                                                                                                                                                                                                                                                                                                                                                                                                                                                                                                                                                                                                                                                                                                                                                                                                                                                                |  |
| Running Head:                                                    | Phase I Research Risks                                                                                                                                                                                                                                                                                                                                                                                                                                                                                                                                                                                                                                                                                                                                                                                                                                                                                                                                                                                                                                                                                                                                                                                                                                                                                                                                                            |  |
| Keywords:                                                        | Ethics ✱, Phase I clinical trials ✱, Healthy volunteers ✱, Data transparency ✱, Research design ✱                                                                                                                                                                                                                                                                                                                                                                                                                                                                                                                                                                                                                                                                                                                                                                                                                                                                                                                                                                                                                                                                                                                                                                                                                                                                                 |  |

**JOURNAL CONTRIBUTOR'S PUBLISHING AGREEMENT**

To be completed by the owner of copyright in the Contribution

TITLE OF CONTRIBUTION: Risks of Phase I Research with Healthy Participants: A Systematic Review  
 INTENDED FOR PUBLICATION IN: *Clinical Trials*  
 AUTHOR NAME(S): Johnson, Rebecca; Rid, Annette; Emanuel, Ezekiel; Wendler, David  
 CORRESPONDING AUTHOR: Dr. David Wendler  
 ADDRESS: National Institutes of Health - Department of Bioethics  
 NIH Clinical Center, 10/1C118, Bethesda, MD 20892

Please read the notes attached, then complete, sign and return this form (using BLOCK LETTERS) to:

**Sajal Jina, SAGE PUBLICATIONS LTD, 1 OLIVER'S YARD, 55 CITY ROAD, LONDON EC1Y 1SP, UK. (FAX: + 44(0) 207 324 8756)**

**SOLE AND EXCLUSIVE LICENCE TO PUBLISH**

I represent that the Contribution is owned by me unless the following is checked:

**Work made for hire for employer/Work done in the course of employment** – The Contribution was prepared by me at the request of my employer and within the scope of my employment and copyright in the Contribution is owned by my employer. (Both the Contributor and an authorized representative of the Contributor's employer must sign this Agreement.) **Employer name:** \_\_\_\_\_

**U. S. Government work** I am an employee of the United States Government and prepared the Contribution as part of my official duties.  
 (If the Contribution was not prepared as part of the Contributor's official duties, it is not a U.S. Government work. If the Contribution was jointly authored, all the co-authors must have been U.S. Government employees at the time they prepared the Contribution in order for it to be a U.S. Government work; if any co-author was not a U.S. Government employee, then the Contribution is not a U.S. Government work. If the Contribution was prepared under a U.S. Government contract or grant, it is not a U.S. Government work - in such case, copyright is usually owned by the contractor or grantee.)

In consideration for publication in the above Journal, of the above Contribution, I hereby grant to the Society for Clinical Trials ("the Proprietor") the sole and exclusive right and licence to produce, publish and make available the Contribution and the abstract prepared by me to accompany the Contribution for the full legal term of copyright and any renewals thereof throughout the world in all languages and in all formats, and through any medium of communication now known or later conceived or developed.

By signing this Contributor Agreement I agree both to the above provisions and to the terms of the agreement attached below.

**Contributor**  
 Signed: 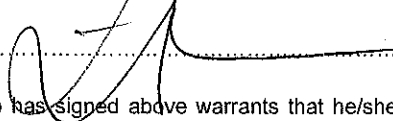 Date: 8/6/15

The author who has signed above warrants that he/she is authorized to sign on behalf of him/herself and, in the case of a multi-authored Contribution, on behalf of all other authors of the Contribution.

**Authorised Representative of Employer** (if Work made for hire/done in the course of employment box is checked)  
 Signed: \_\_\_\_\_ Date: \_\_\_\_\_

**For <Society>:**  
 [insert scanned signature]

This Agreement may be signed and executed in the following ways:

- Traditional hard copy – please sign and return the Agreement.
- By fax – please sign and fax a copy of the Agreement.
- By e-mail – a scanned hard copy of the Agreement with your signature on it or a digital original copy with your electronic signature are equally acceptable.

Further

- One contributor may sign on behalf of any co-authors if authorized to do so by the co-authors.
- All parties may sign one document OR
- Individual parties may sign separate copies of the same agreement (using any of the methods described above) and return them individually.

## TERMS OF THE AGREEMENT

### Copyright

While copyright remains mine as the author, I hereby authorise the Proprietor and Sage Publications Ltd ('SAGE') to act on my behalf to defend my copyright should it be infringed and to retain half of any damages awarded, after deducting costs.

### Warranties

I warrant to the Proprietor and to SAGE that the Contribution is my original work, that I have the full power and authority to enter into this Agreement and to convey the rights granted herein to the Proprietor and to submit the work for first publication in the Journal and that it is not being considered for publication elsewhere and has not already been published elsewhere, either in printed or electronic form, that I have obtained and enclose all necessary permissions for the reproduction of any copyright works (including artistic works, e.g. illustrations, photographs, charts, maps, other visual material, etc.) contained in the Contribution and not owned by me and that I have acknowledged all the source(s), that the Contribution contains no violation of any existing copyright, other third party rights or any libellous or untrue statements and does not infringe any rights of others, and I agree to indemnify the Proprietor and SAGE against any claims in respect of the above warranties. I further agree to be bound by the Conditions of Publication provided herein as part of this Agreement which outline the circumstances under which work may be reused.

SAGE for its benefit in accordance with the provisions of the Contracts (Rights of Third Parties) Act 1999 hereby asserts its right to the protection of the above warranties and indemnities.

### Declaration of Conflicting Interests

I certify that:

1. All forms of financial support, including pharmaceutical company support, are acknowledged in the Contribution
2. Any commercial or financial involvements that might present an appearance of a conflict of interest related to the Contribution are disclosed in the covering letter accompanying the Contribution and all such potential conflicts of interest will be discussed with the Editor as to whether disclosure of this information with the published Contribution is to be made in the Journal.
3. I have not signed an agreement with any sponsor of the research reported in the Contribution that prevents me from publishing both positive and negative results or that forbids me from publishing this research without the prior approval of the sponsor.
4. I have checked in the manuscript submission guidelines whether this Journal requires a Declaration of Conflicting Interests and complied with the requirements specified where such a policy exists.



It is not expected that the details of financial arrangements should be disclosed. If the Journal does require a Declaration of Conflicting Interests and no conflicts of interest are declared, the following will be printed with your article: 'None Declared'.

### **Termination**

The Proprietor and SAGE, together in their sole, absolute discretion, may determine that the Contribution should not be published in the Journal. If in the rare circumstance the decision is made not to publish the Contribution after accepting it for publication, then all rights in the Contribution granted to the Proprietor shall revert to you and this Agreement shall be of no further force and effect, and neither you nor the Proprietor nor SAGE will have any obligation to the other with respect to the Contribution.

### **Counterparts; Facsimile**

This Agreement may be executed in counterparts each of which shall be deemed the original, all of which together shall constitute one and the same Agreement. A faxed copy or other electronic copy shall be deemed as an original.

### **Electronic Signature Authorization**

This transaction may be conducted by electronic means and the parties authorize that their electronic signatures act as their legal signatures of this Agreement. This Agreement will be considered signed by a party when his/her/its electronic signature is transmitted. Such signature shall be treated in all respects as having the same effect as an original handwritten signature. (You are not required to conduct this transaction by electronic means or use an electronic signature, but if you do so, then you hereby give your authorization pursuant to this paragraph.)

### **Modification; Entire Agreement; Severability**

No amendment or modification of any provision of this Agreement shall be valid or binding unless made in writing and signed by all parties. This Agreement constitutes the entire agreement between the parties with respect to its subject matter, and supersedes all prior and contemporaneous agreements, understandings and representations. The invalidity or unenforceability of any particular provision of this Agreement shall not affect the other provisions, and this Agreement shall be construed in all respects as if any invalid or unenforceable provision were omitted.

### **Governing Law; Arbitration**

This Agreement shall be deemed to be a contract made in England and shall be construed and applied in all respects in accordance with English law and the parties submit and agree to the jurisdiction of the English courts.

If any difference shall arise between you and SAGE and the Proprietor touching the meaning of this Agreement or the rights and liabilities of the parties thereto, the same shall be referred to the arbitration of two persons (one to be named by each party) or their mutually agreed umpire, in accordance with the provision of the England Arbitration Act 1996 or any amending or substituted statute for the time being in force.

## Your rights as author

### You retain copyright in the work.

Without further permission:

- You may circulate or post on any repository or website the version of the article that you submitted to the journal (i.e. the version before peer-review) – **'version 1'**.
- You may post on any non-commercial repository or website the version of your article that was accepted for publication – **'version 2'**. The article may not be made available earlier than 12 months after publication in the Journal issue and may not incorporate the changes made by SAGE after acceptance.
- You may re-publish the whole or any part of the Contribution in a book written, edited or compiled by you provided reference is made to first publication by SAGE. The article may not be made available earlier than 12 months after publication in the Journal issue without permission from SAGE.
- You may make photocopies of the published article for your own teaching needs or to supply on an individual basis to research colleagues on a not-for-profit basis.
- You may not post the final version of the article as published by SAGE or the SAGE-created PDF – **'version 3'**.
- All commercial or any other re-use of the published article should be referred to SAGE. More information can be found at:  
<http://www.sagepub.co.uk/journalsPermissions.nav>

When posting or re-using the article, you should provide a link/URL from the article posted to the SAGE Journals Online site where the article is published: <http://online.sagepub.com> and please make the following acknowledgment: **'The final, definitive version of this paper has been published in <journal>, Vol/Issue, Month/Year by SAGE Publications Ltd, All rights reserved. © [The Author(s)]'**

You may wish to register with the ALCS: <http://www.alcs.co.uk/> (or your equivalent national blanket licensing authority) so that you will receive royalties due to you from any reprographic rights income.

### The Society and SAGE's use of the work

Although you have retained the copyright in your article, you have granted the Society an exclusive licence to use it. This helps us to ensure adequate protection against infringement of copyright protected material through breach of copyright or piracy anywhere in the world. It also ensures that requests by third parties to reprint or reproduce a contribution, or part of it in any format, are handled efficiently in accordance with our general policy which encourages dissemination of knowledge inside the framework of copyright.

Where practicable, you will be informed of requests to re-use your article. This does not apply to blanket arrangements covering the Journal as a whole or arrangements covering groups of journals such as arrangements made with the Copyright Licensing Agency in the UK, or Copyright Clearance Center in the USA. Please keep our mailing list up to date with your institutional or business address changes to help us to do this. Inadvertent failure to inform you will not constitute a material breach of this Agreement.

### **Your responsibilities as author: inclusion of other copyright material**

SAGE is sympathetic to the needs of scholars to include other copyright material, and is happy to provide guidance on this. Responsibility for obtaining permission to use any other copyright material rests with you as the author of the Contribution.

If your Contribution includes material which is not your copyright, you are responsible for submitting with your manuscript the written permission from those who control copyright in that material to include it and reproduce it within your Contribution. In most cases this will be the publisher of the work. As the Journal is available in both print and electronic media and may be translated or archived, this permission needs to be for all media in all languages in perpetuity. You are responsible for the payment of any permission fees.

### **Fair Dealing information for your reference:**

**Fair Dealing** provisions under UK copyright law and/or the **Fair Use** provisions under US law for use of material in review, and/or other International Copyright Laws allow for the limited use of third party copyright materials in particular circumstances, without the requirement to obtain permission as above.

The term 'fair dealing' is not defined in UK legislation itself but should be viewed from a qualitative as well as a quantitative perspective. There are no set rules which cover what is or is not fair dealing. For guidance:

- Fair dealing can only apply to material used for specific purposes including those of criticism and review and news reporting and incidental use.
- Permission should always be sought where reproduction could reasonably be construed as competing with the sale of the original source and/or where the amount of copying is substantial.
- Whether you are including material with permission, or on the basis that it falls under 'fair dealing' or 'fair use', you must include acknowledgement of the copyright holder and original publication of the material.

***If you are in doubt, please ask for advice from SAGE or the journal editor.***
